# Supplementary material for: Recognition of acids involved in Krebs cycle by 9-anthrylmethyl-di(6-acetylamino-2-picolyl)amine: a case of selective fluorescence enhancement for maleic acid
Source: Royal Society of Chemistry journal article supplement (doi:10.1039/c1nj20339h), 2011-01-01
Supplement: c1nj20339h.pdf [file c1nj20339h.pdf]

## Supplementary Materials:

### Recognition of acids involve in Krebs cycle by 9-Anthrylmethyl-di(6-acetylamino-2-picolyl)amine: a case of selective fluorescence enhancement for maleic acid

| Content                                                                                 | Page No. |
|-----------------------------------------------------------------------------------------|----------|
| <sup>1</sup> H NMR, <sup>13</sup> C NMR and HRMS of <b>1</b>                            | S5-7     |
| <sup>1</sup> H NMR, <sup>13</sup> C NMR and mass of <b>4</b>                            | S8-10    |
| <sup>1</sup> H NMR, <sup>13</sup> C NMR and mass of <b>5</b>                            | S11-13   |
| <sup>1</sup> H NMR, <sup>13</sup> C NMR and HRMS of <b>6</b>                            | S14-16   |
| <sup>1</sup> H NMR, <sup>13</sup> C NMR and mass of <b>7</b>                            | S17-19   |
| <sup>1</sup> H NMR of compound <b>2</b>                                                 | S20      |
| Partial <sup>1</sup> H NMR of <b>1</b> with (1:1) succinic acid                         | S21      |
| Partial <sup>1</sup> H NMR of <b>1</b> with (1:1) <i>dl</i> -maleic acid                | S22      |
| Partial <sup>1</sup> H NMR of <b>1</b> with (1:1) fumaric and citric acid               | S23      |
| Partial <sup>1</sup> H NMR of <b>1</b> with (1:1) and (1:3) TFA                         | S24      |
| <sup>1</sup> H NMR of <b>2</b> with (1:1) succinic and (1:1) maleic acid                | S25      |
| <sup>1</sup> H NMR of <b>2</b> with (1:1) fumaric and (1:1) <i>dl</i> -malic acid       | S26      |
| <sup>1</sup> H NMR of <b>2</b> with (1:1) citric acid                                   | S27      |
| <sup>1</sup> H NMR of <b>2</b> with (1:1) and (1:3) TFA acid                            | S27-28   |
| <sup>1</sup> H NMR of <b>1</b> with (1:1) <i>dl</i> -malate                             | S28      |
| <sup>1</sup> H NMR of <b>1</b> with (1:1) succinate and (1:1) fumarate                  | S29      |
| <sup>1</sup> H NMR of <b>1</b> with (1:1) citrate and (1:1) maleate                     | S30      |
| <sup>1</sup> H NMR of <b>1</b> with (1:1) mono tetrabutylammonium salt of succinic acid | S31      |
| <sup>1</sup> H NMR of <b>1</b> with (1:1) mono tetrabutylammonium salt of citric acid   | S31      |

|                                                                                                              |        |
|--------------------------------------------------------------------------------------------------------------|--------|
| <sup>1</sup> H NMR of <b>1</b> with (1:1) mono tetrabutylammonium salt of dl-malic acid                      | S32    |
| <sup>1</sup> H NMR of <b>1</b> with (1:1) mono tetrabutylammonium salt of maleic acid                        | S32    |
| <sup>1</sup> H NMR of <b>1</b> with (1:1) mono tetrabutylammonium salt of fumaric acid                       | S32    |
| UV-titration spectra of receptor <b>1</b> with citric, fumaric and succinic acid                             | S33    |
| UV-titration spectra of receptor <b>1</b> with dl-malic and maleic acid                                      | S34    |
| UV-titration spectra of receptor <b>1</b> with TFA                                                           | S35    |
| Job plot and fluorescence titration curve of receptor <b>1</b> with guest acids                              | S35    |
| Fluorescence titration spectra of <b>1</b> with succinic, dl-malic and fumaric acid                          | S36    |
| Fluorescence titration spectra of <b>1</b> with citric acid and TFA                                          | S37    |
| Linear regression analysis for the binding constant curve of <b>1</b> with guest acids                       | S37-38 |
| UV-vis and fluorescence titration spectra of <b>1</b> with citrate                                           | S39    |
| UV-vis and fluorescence titration spectra of <b>1</b> with dl-malate                                         | S39-40 |
| UV-vis and fluorescence titration spectra of <b>1</b> with fumarate                                          | S40    |
| UV-vis and fluorescence titration spectra of <b>1</b> with maleate                                           | S41    |
| UV-vis and fluorescence titration spectra of <b>1</b> with succinate                                         | S41-42 |
| Binding constant calculation plot of <b>1</b> with anions                                                    | S42    |
| Linear regression analysis of <b>1</b> with anions                                                           | S43-44 |
| Table 5: Binding constant table for <b>1</b> with acids and anions                                           | S44    |
| Job plot of <b>1</b> with anions                                                                             | S44    |
| UV vis. titration spectra of <b>1</b> with monotetrabutylammonium salt of citric, dl-malic and succinic acid | S45    |

|                                                                                                                                                  |               |
|--------------------------------------------------------------------------------------------------------------------------------------------------|---------------|
| UV vis. titration spectra of <b>1</b> with<br>monotetrabutylammonium salt of maleic and fumaric acid                                             | <b>S46</b>    |
| Job plot of <b>1</b> with monotetrabutylammonium salt of guest acids                                                                             | <b>S46</b>    |
| Fluorescence titration spectra of <b>1</b> with<br>monotetrabutylammonium salt of citric, dl-malic, succinic acid                                | <b>S47</b>    |
| Fluorescence titration spectra of <b>1</b> with<br>monotetrabutylammonium salt of maleic and fumaric acid                                        | <b>S48</b>    |
| Binding constant calculation curve of <b>1</b> with<br>monotetrabutylammonium salt of guest acids                                                | <b>S48</b>    |
| Linear regression analysis of <b>1</b> with<br>monotetrabutyl ammonium salt of acids                                                             | <b>S49-50</b> |
| Table 6: binding constants of monotetrabutylammonium salts<br>of guest acids with <b>1</b>                                                       | <b>S50</b>    |
| UV vis. and fluorescence titrations of <b>2</b> with succinic acid                                                                               | <b>S50-51</b> |
| UV vis. and fluorescence titrations of <b>2</b> with fumaric acid                                                                                | <b>S51</b>    |
| UV vis. and fluorescence titrations of <b>2</b> with citric acid                                                                                 | <b>S52</b>    |
| UV vis. and fluorescence titrations of <b>2</b> with maleic acid                                                                                 | <b>S52-53</b> |
| UV vis. and fluorescence titrations of <b>2</b> with dl-malic acid                                                                               | <b>S53</b>    |
| UV vis. and fluorescence titrations of <b>2</b> with TFA                                                                                         | <b>S54</b>    |
| Illustration of crystal structure of receptor <b>1</b> in polymorph <b>A</b>                                                                     | <b>S55</b>    |
| Illustration of crystal structure of receptor <b>1</b> in polymorph <b>B</b>                                                                     | <b>S55</b>    |
| Illustration of crystal structure of complex <b>A</b>                                                                                            | <b>S56</b>    |
| Table 7: Crystallographic data and structure refinement parameters<br>of receptor <b>1</b> in form <b>A</b> , form <b>B</b> and complex <b>A</b> | <b>S57</b>    |
| Table 8: Hydrogen-bond parameters (Å, °) of receptor <b>1</b> in form <b>A</b>                                                                   | <b>S58</b>    |
| Table 9: Hydrogen-bond parameters (Å, °) of receptor <b>1</b> in form <b>B</b>                                                                   | <b>S58</b>    |
| Table 10: pKa values of different dicarboxylic acids                                                                                             | <b>S58</b>    |

|                                                                      |            |
|----------------------------------------------------------------------|------------|
| Experimental general                                                 | <b>S59</b> |
| General procedure for UV-vis and Fluorescence titration and Job plot | <b>S60</b> |
| X-ray data collection and ORTEP plotting                             | <b>S61</b> |

$^1\text{H}$  NMR of 1:

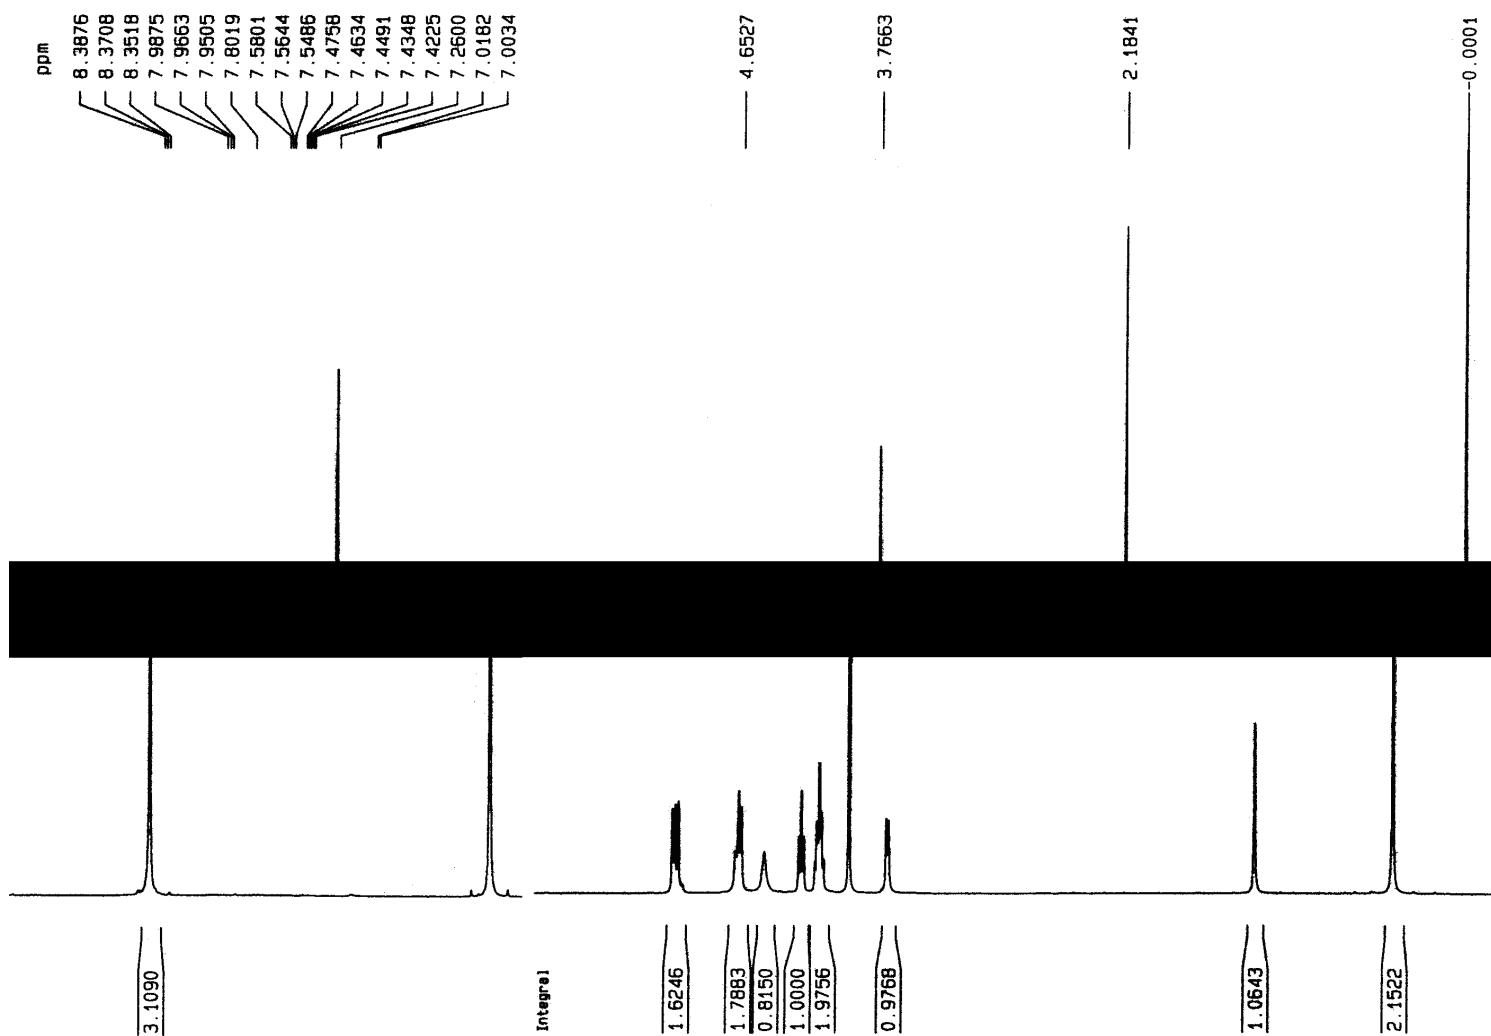

$^{13}\text{C}$  NMR of **1**:

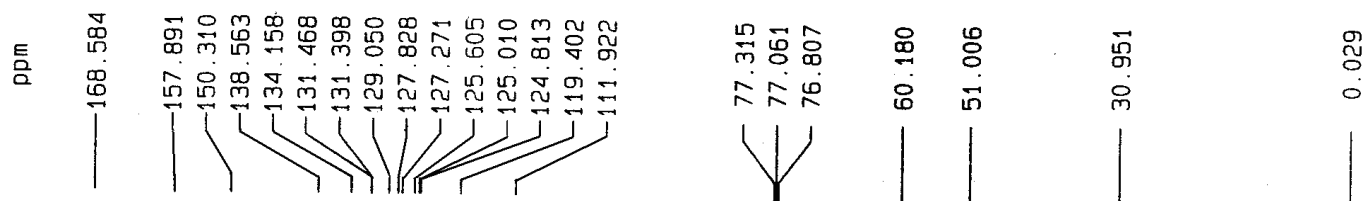

HRMS of 1:

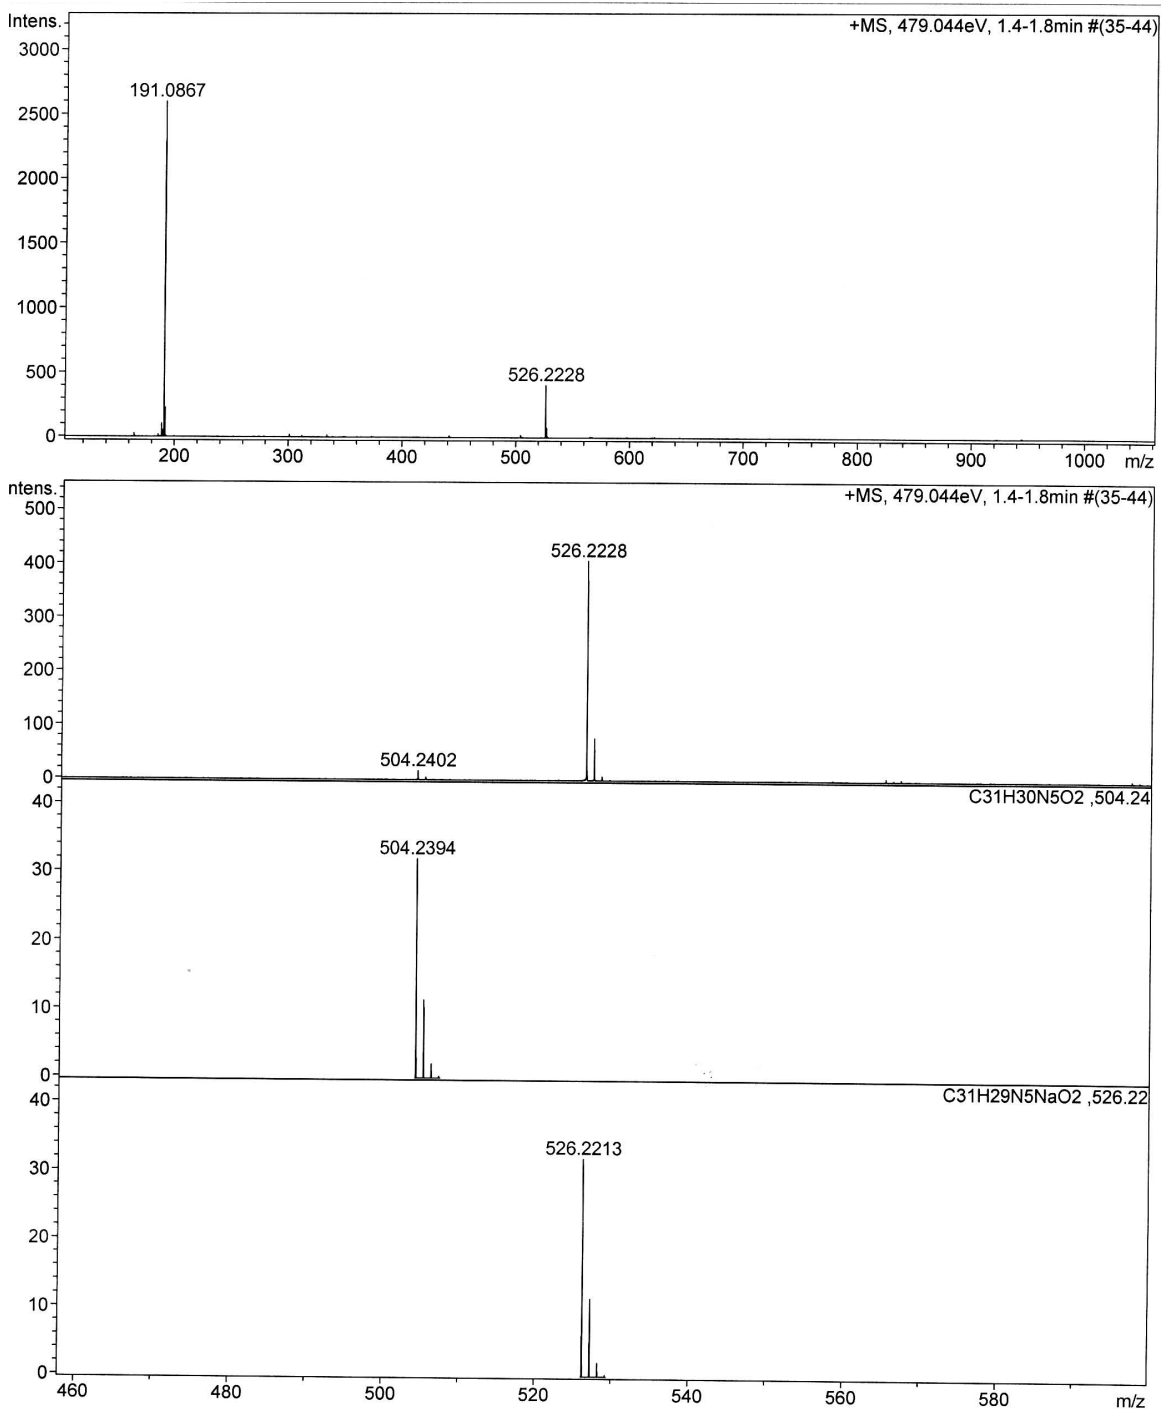

$^1\text{H}$  NMR of 4:

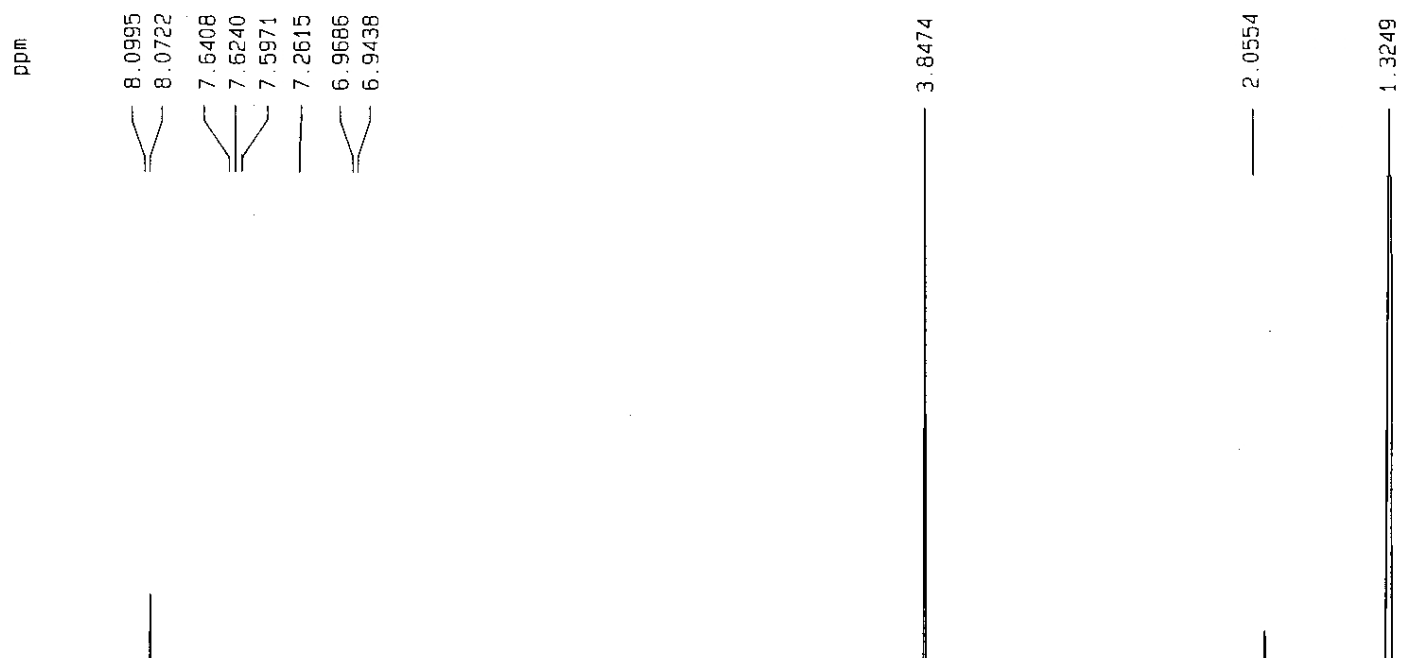



$^{13}\text{C}$ -NMR of 4:

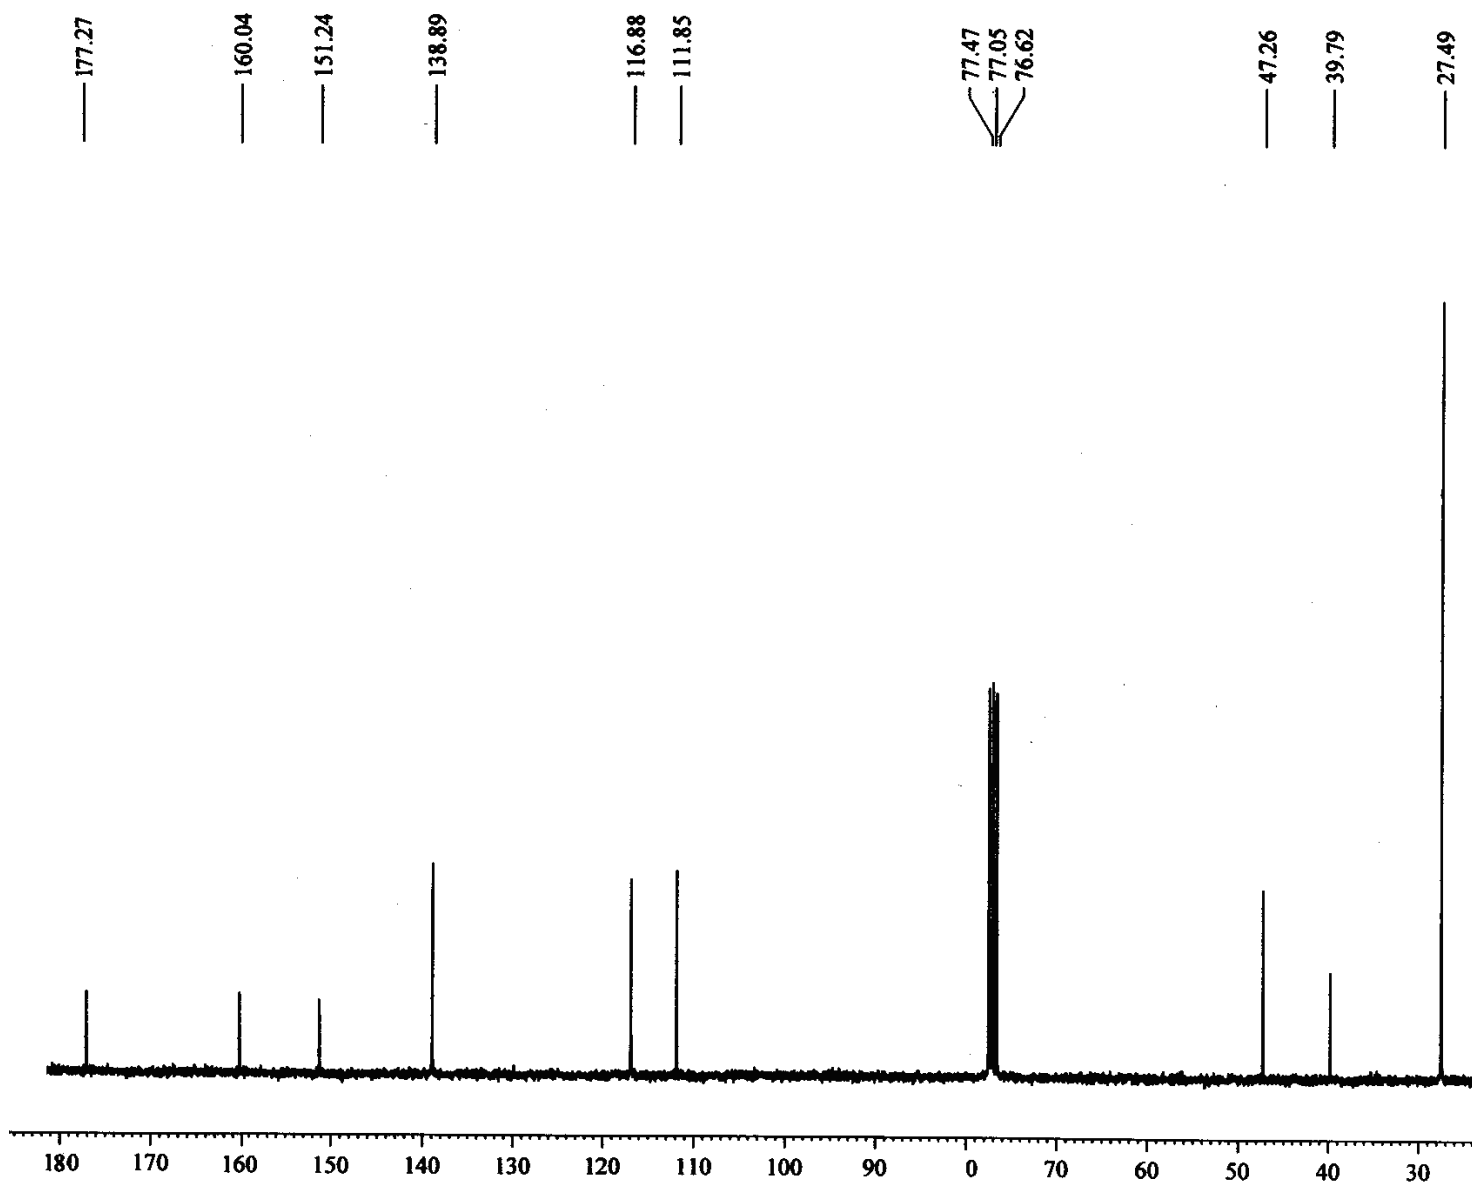

ESI-MS of compound 4:

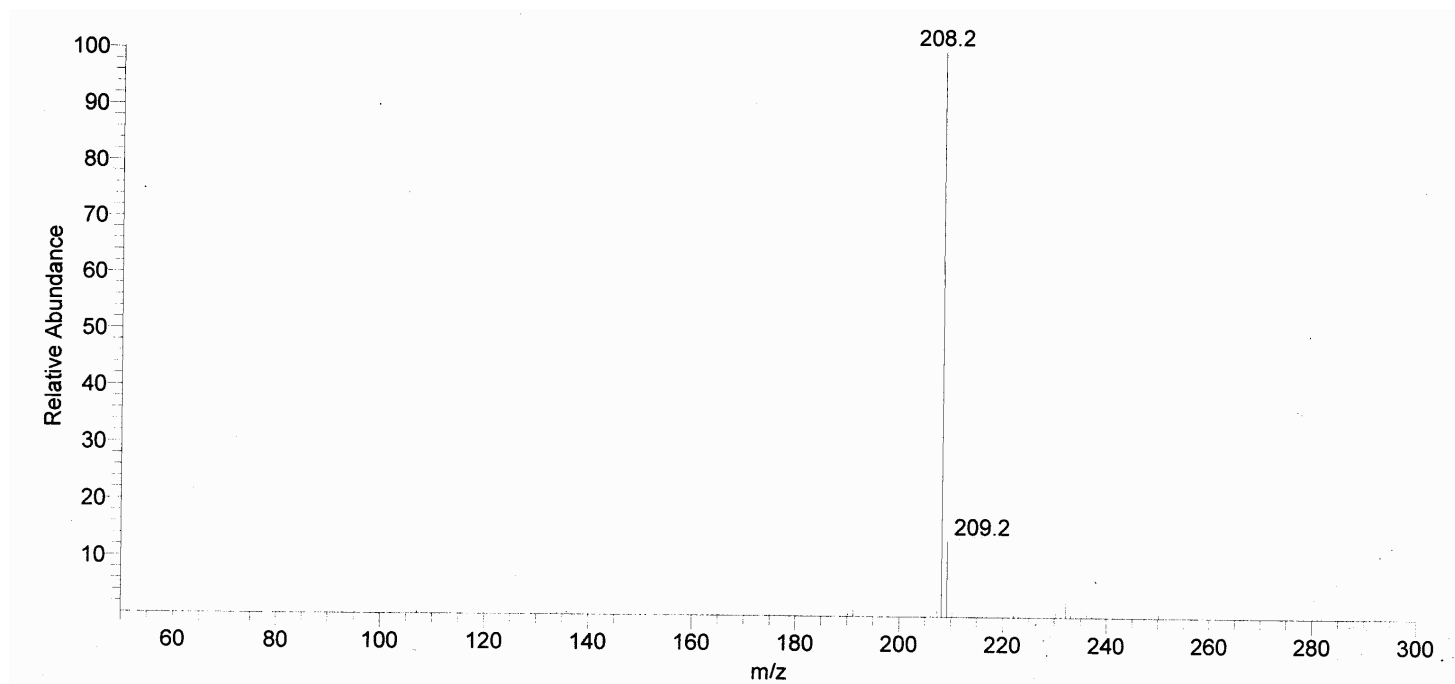

$^1\text{H}$  NMR of compound 5:

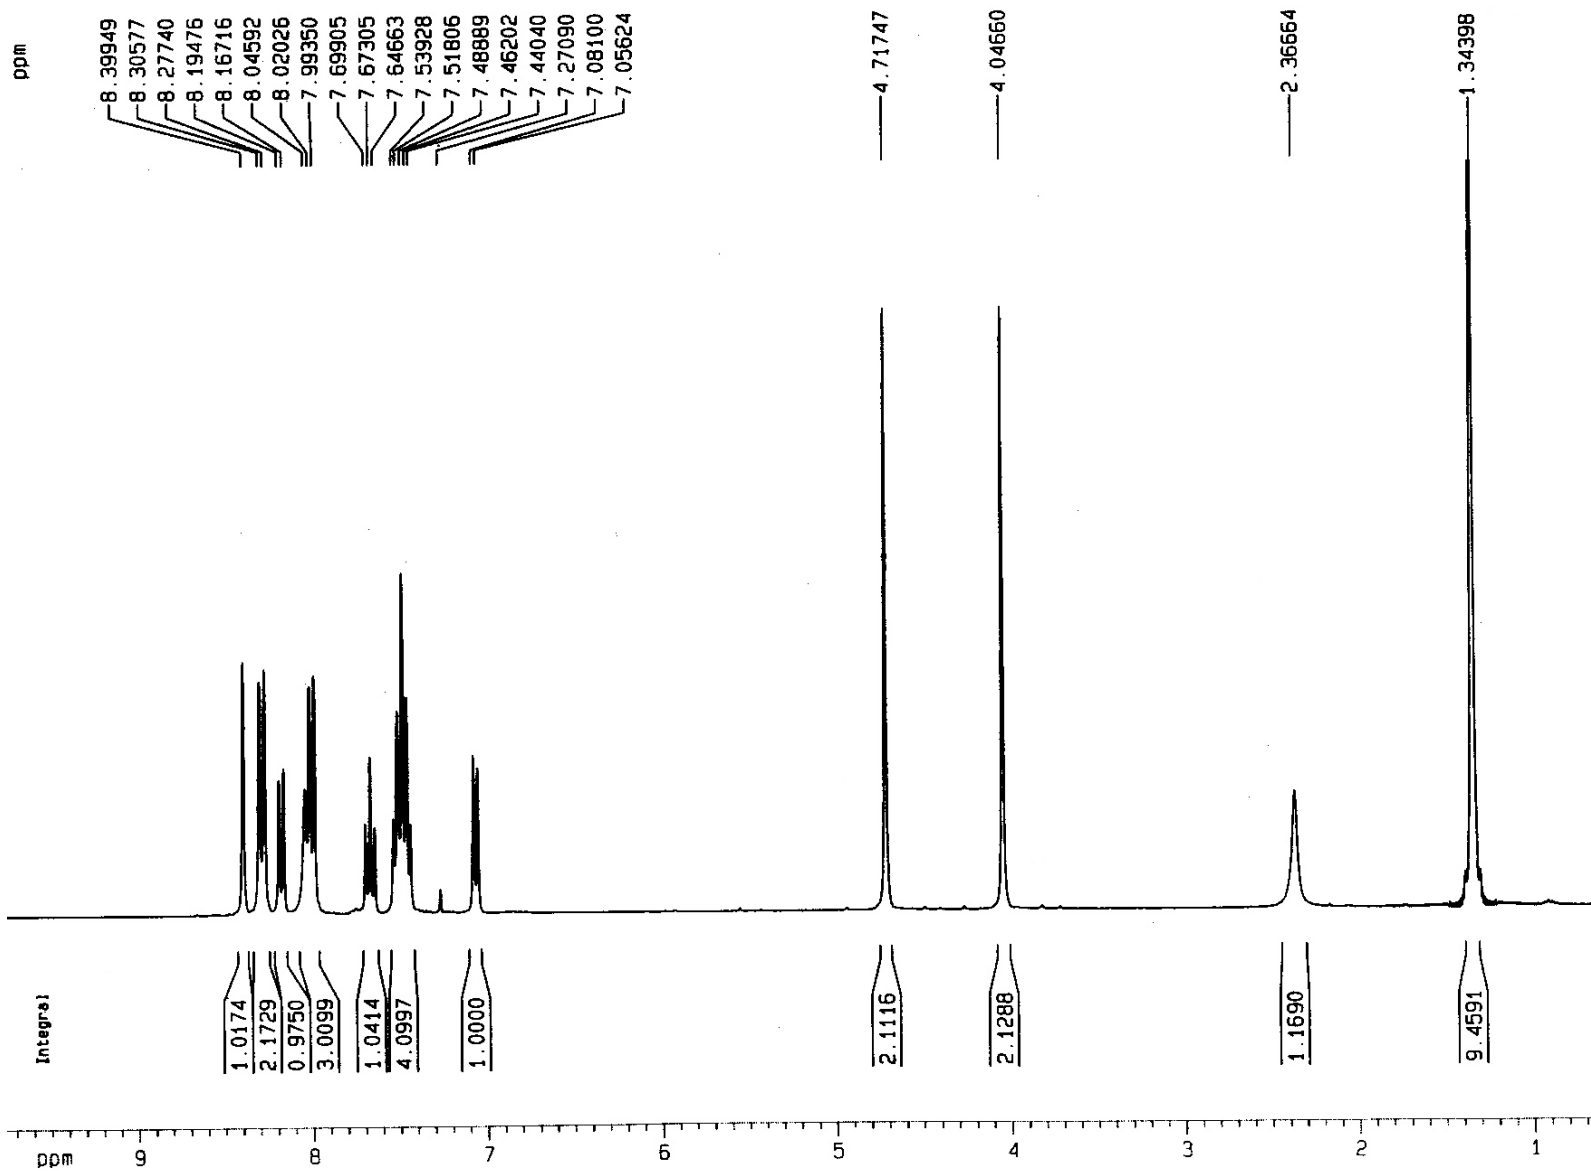

$^{13}\text{C}$  NMR of compound **5**:

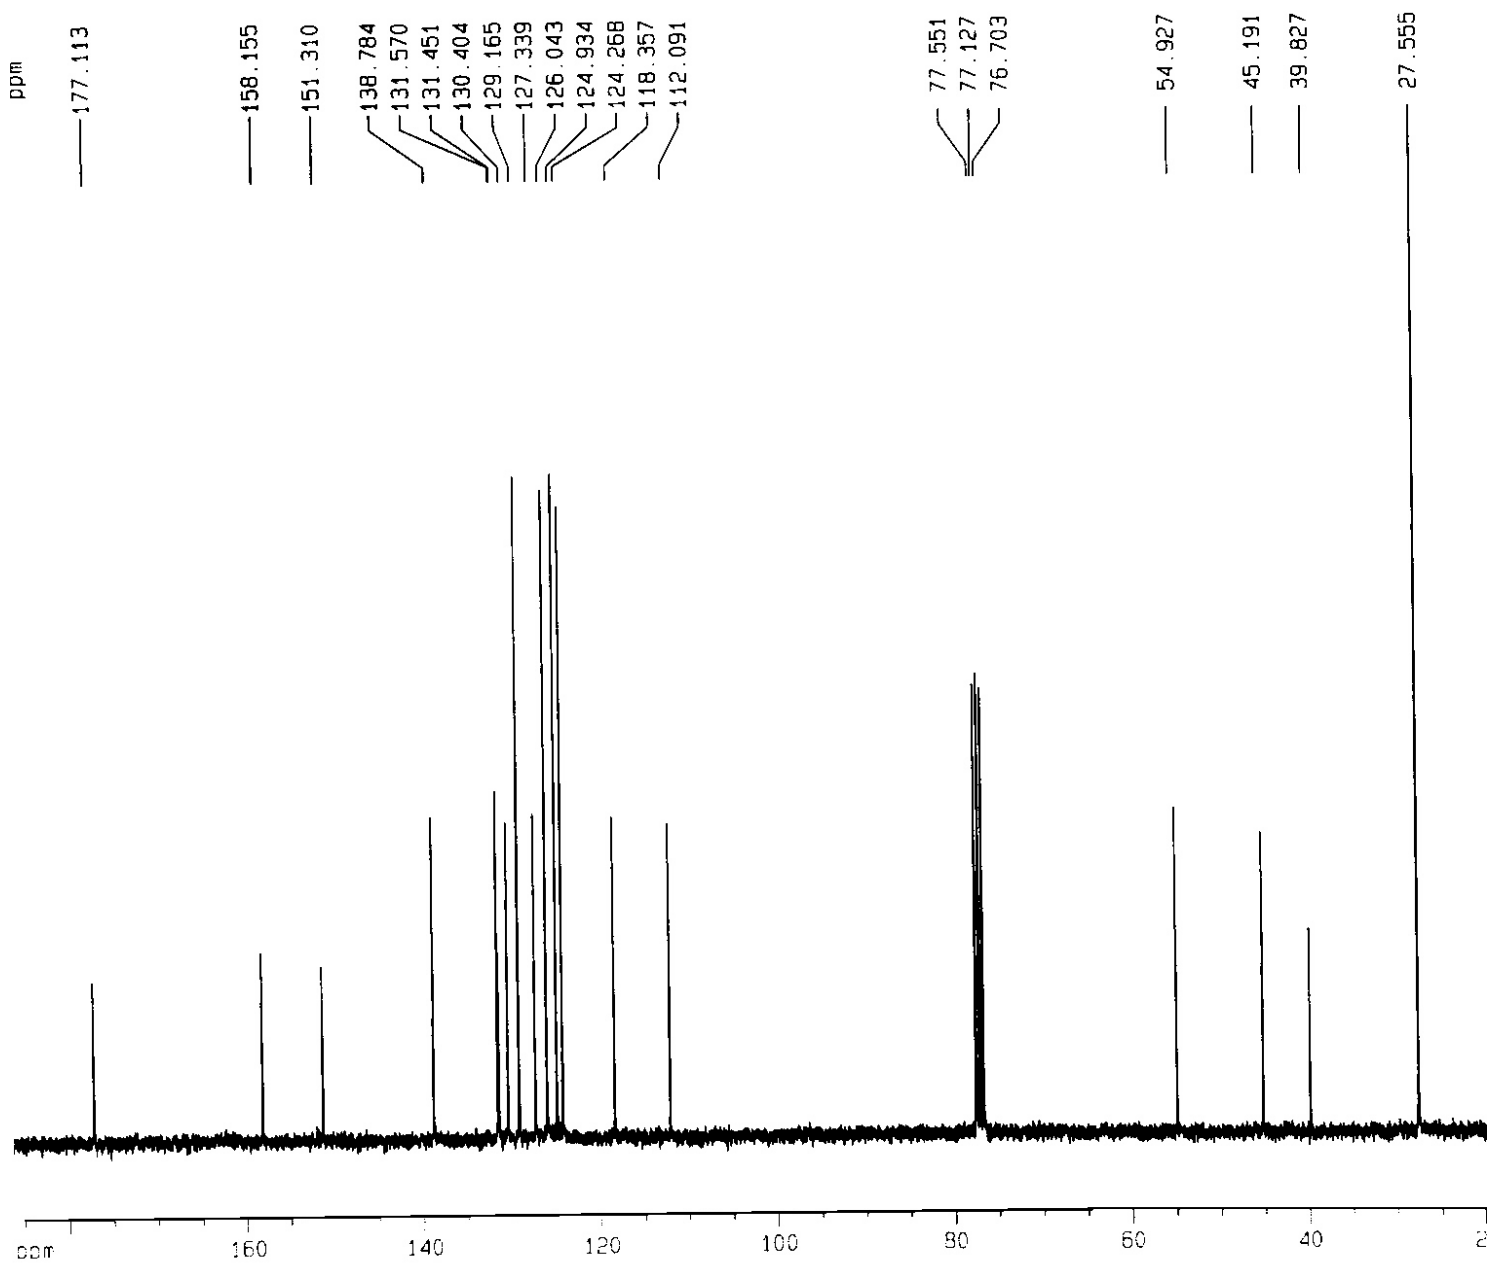

ESI-MS of compound 5:

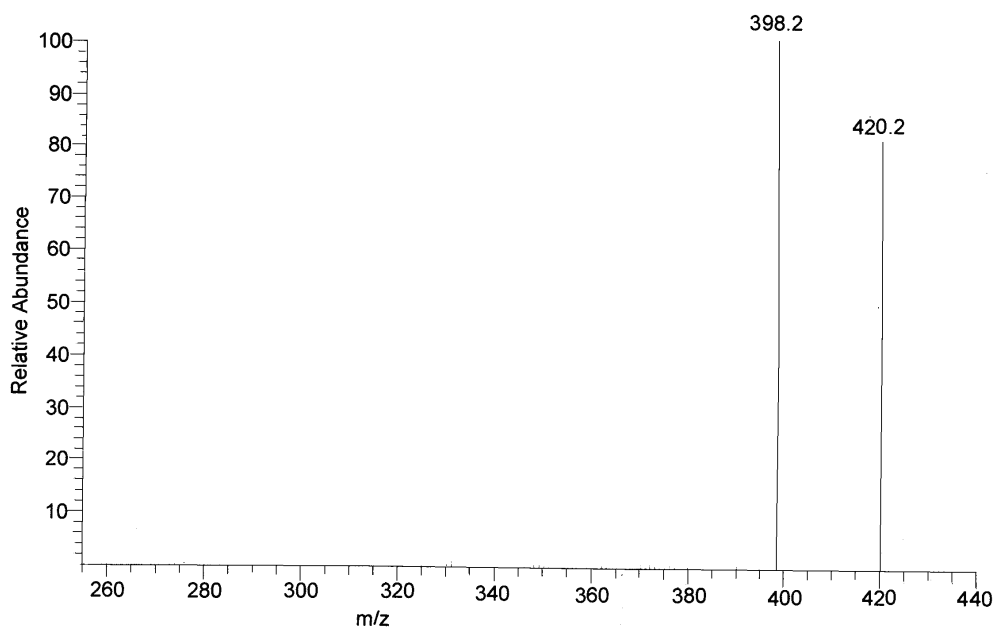

$^1\text{H}$  NMR of compound 6:

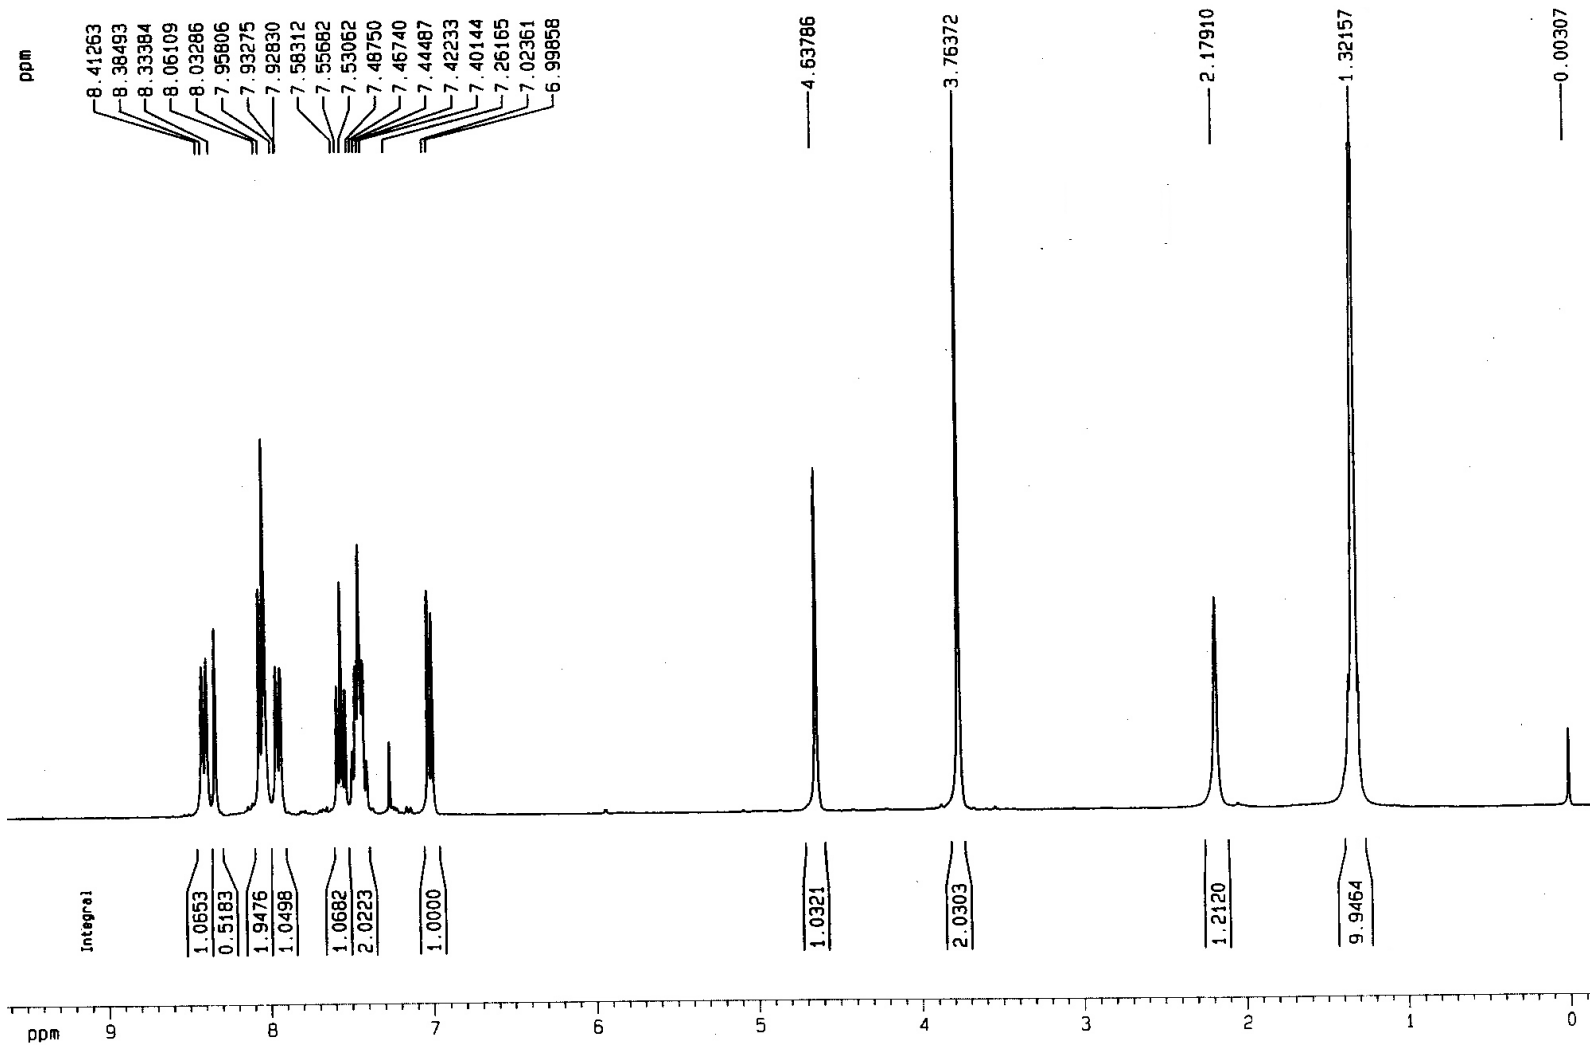

<sup>13</sup>C NMR of compound **6**:

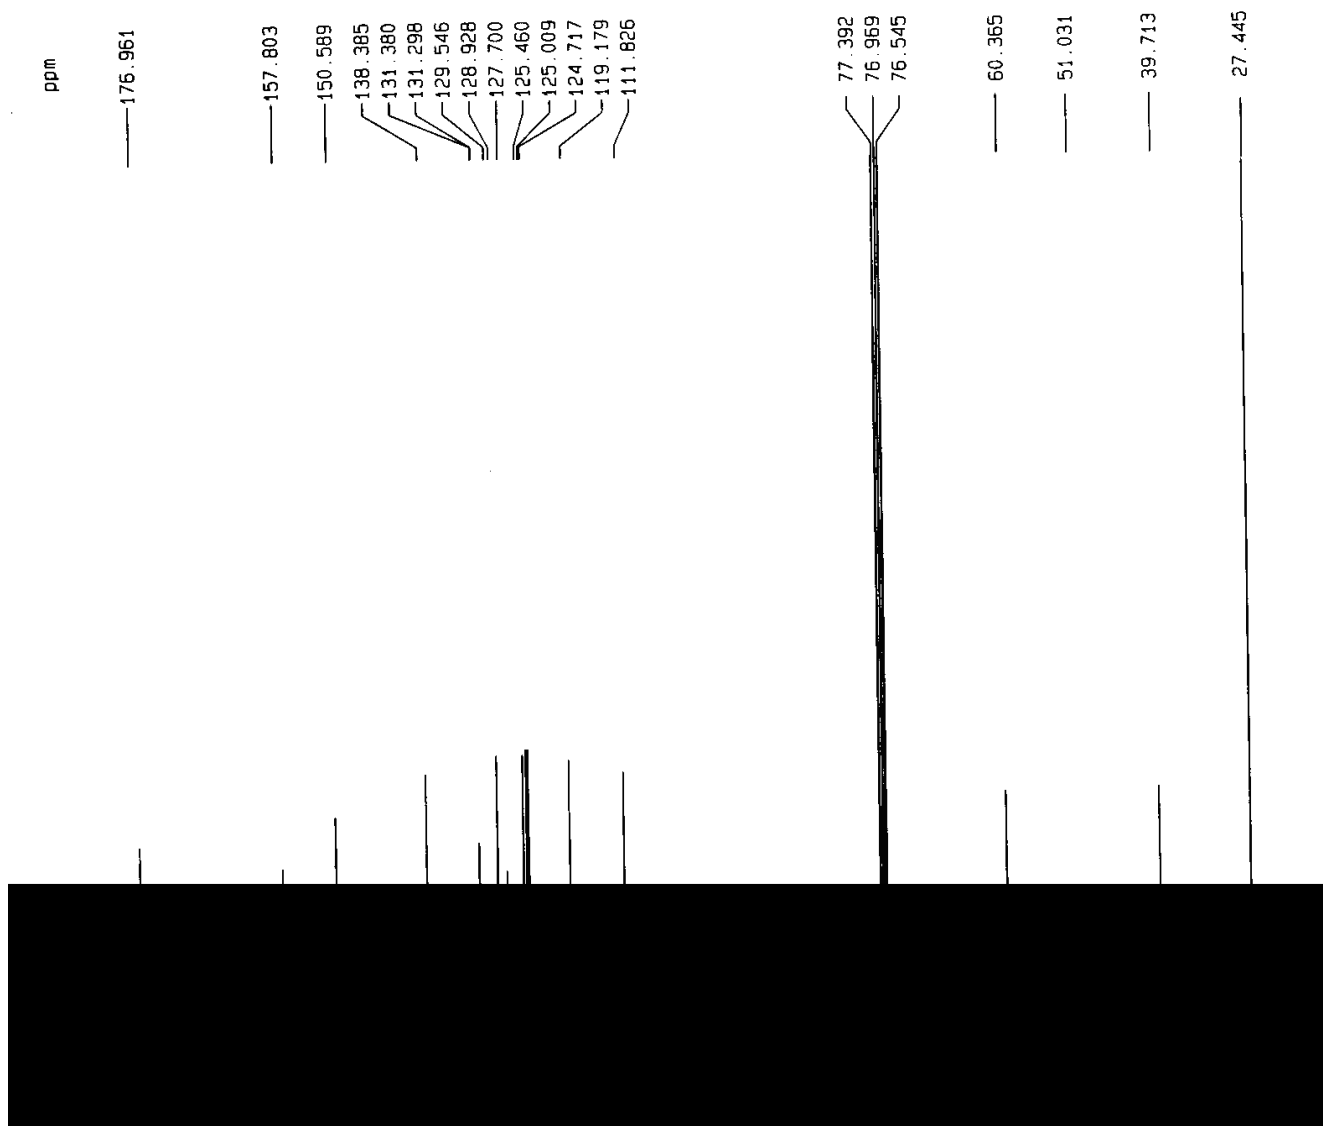

HRMS of compound 6:

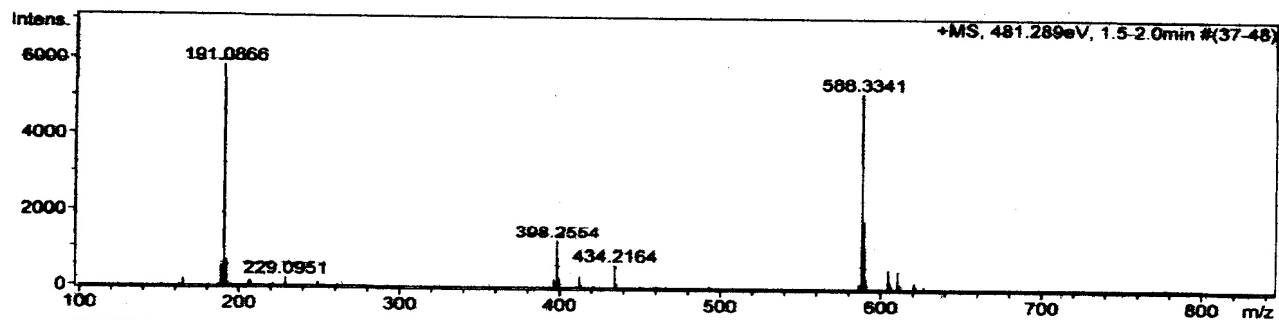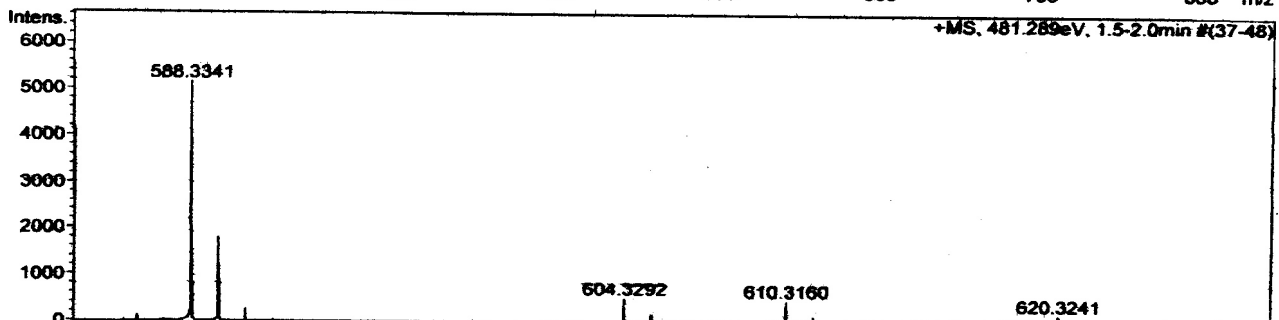

C<sub>37</sub>H<sub>42</sub>N<sub>5</sub>O<sub>2</sub>, 588.33

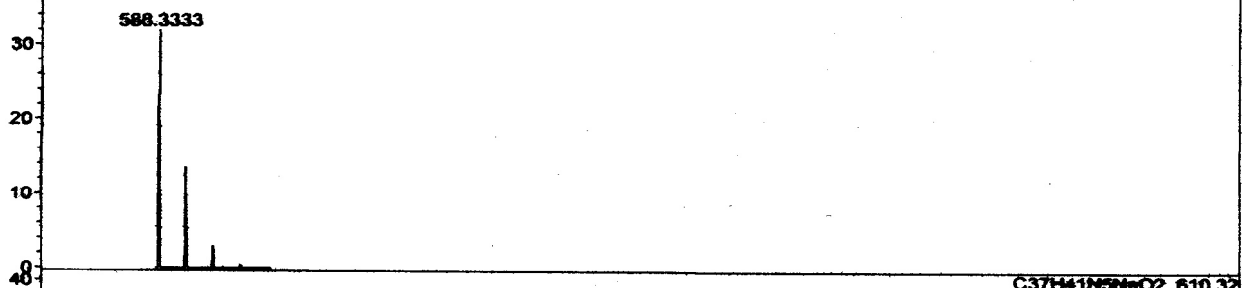

C<sub>37</sub>H<sub>41</sub>N<sub>5</sub>NaO<sub>2</sub>, 610.32

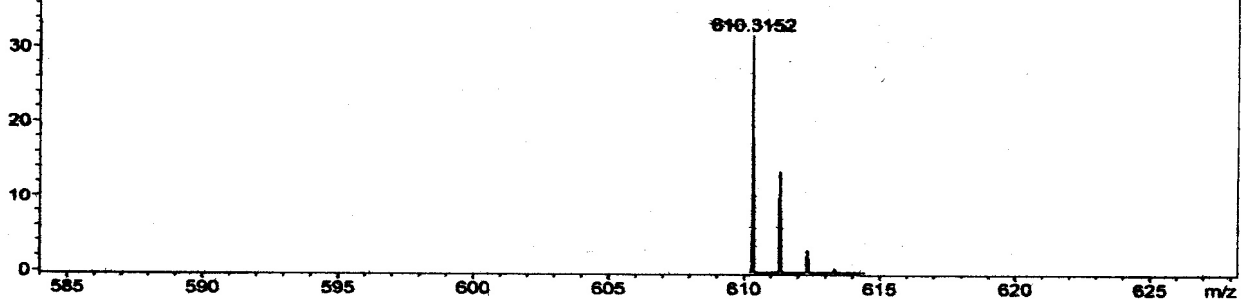



$^1\text{H-NMR}$  of Compound 7:

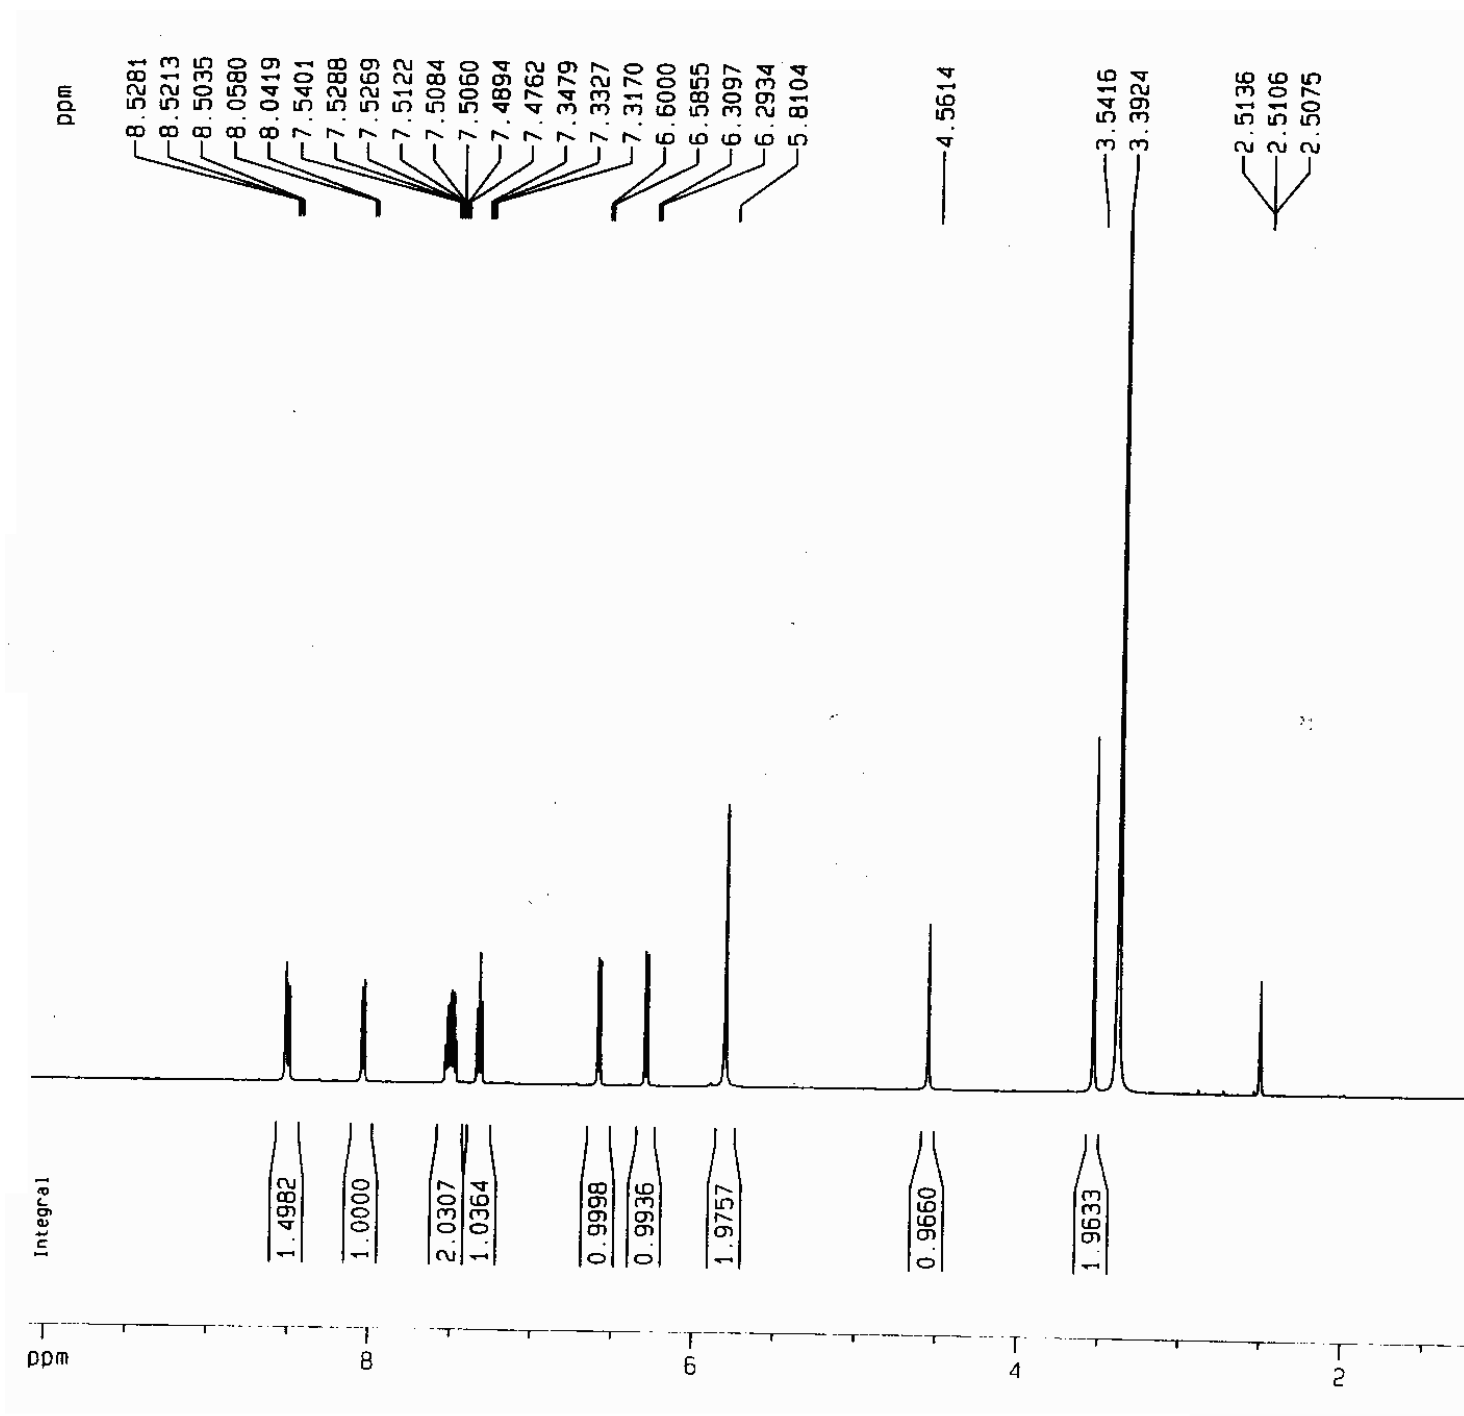

$^{13}\text{C}$ -NMR of Compound 7:

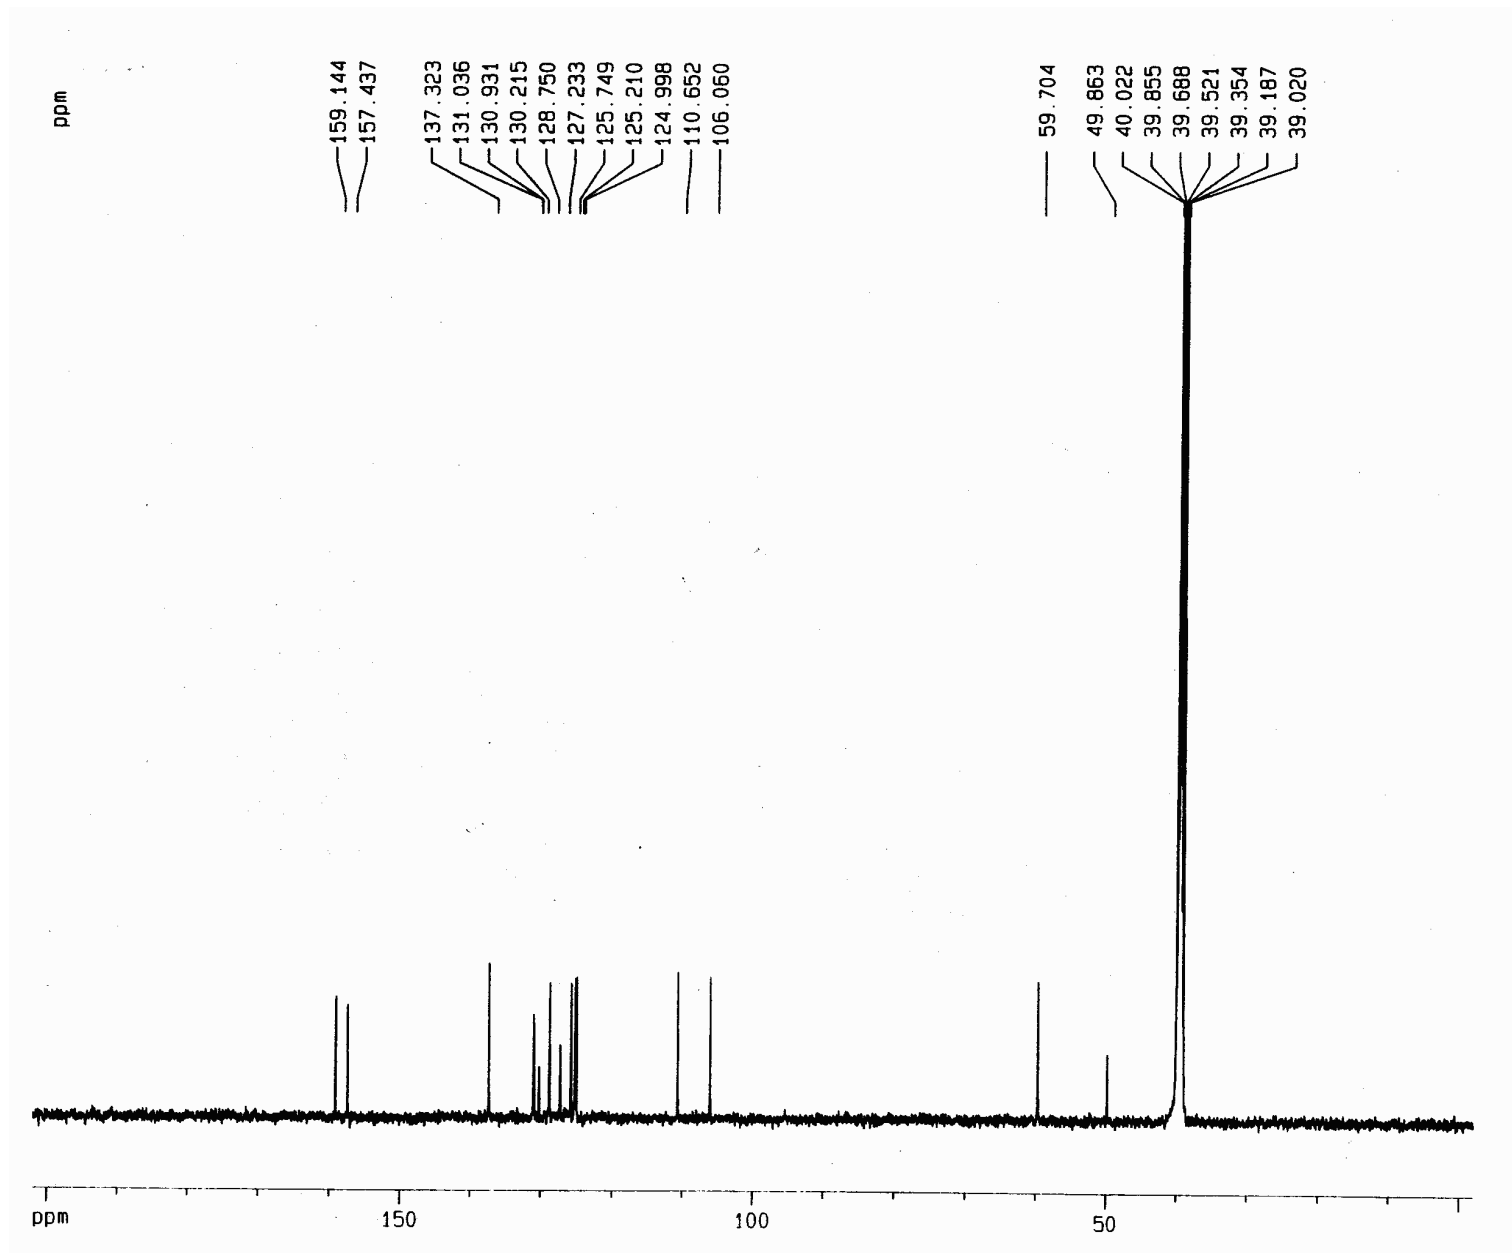

ESI-MS of compound 7:

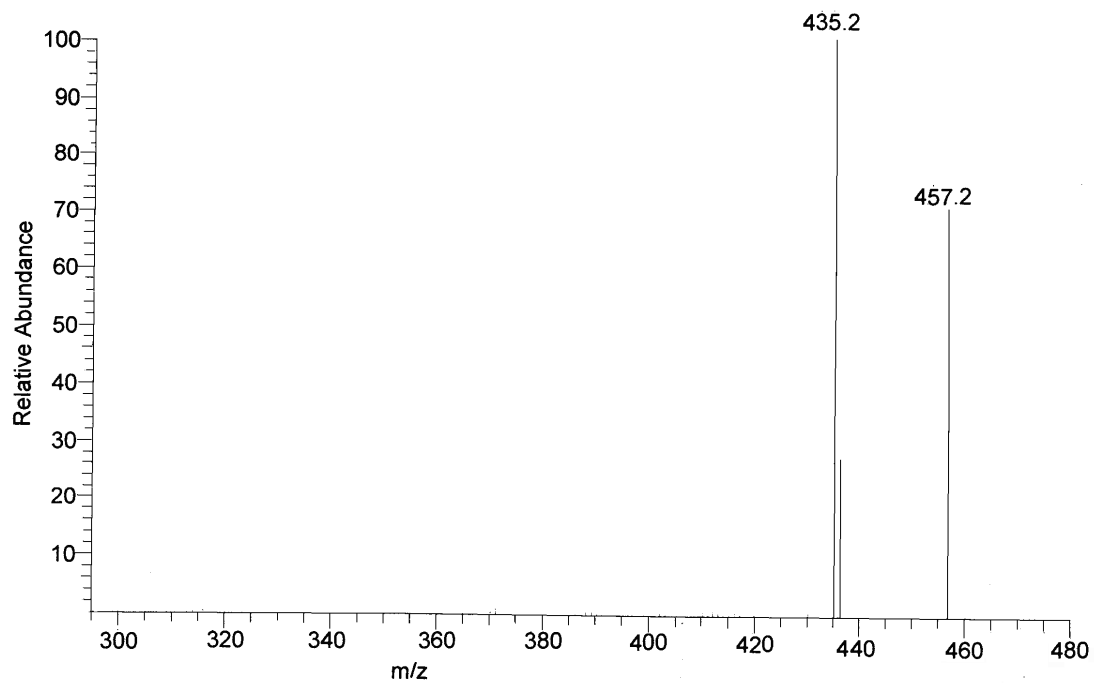

$^1\text{H-NMR}$  of **2**:

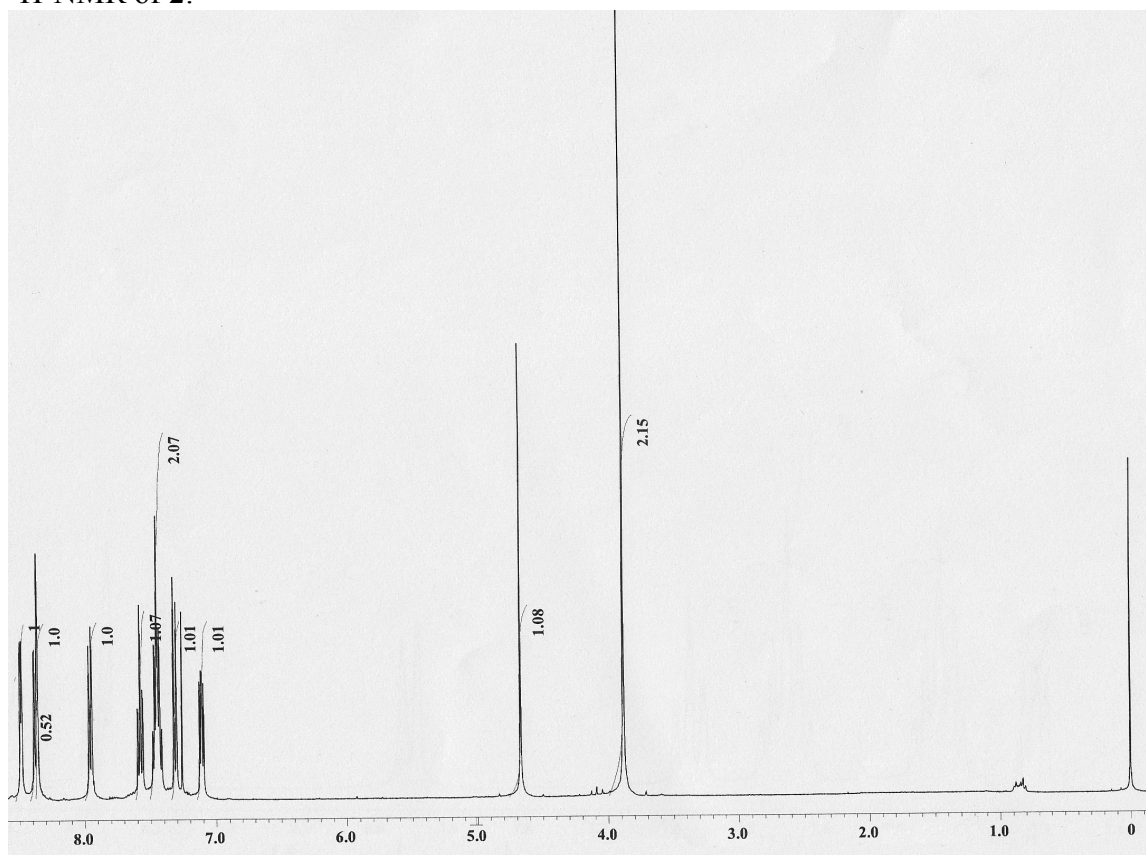

Partial  $^1\text{H}$  NMR with succinic acid and **1**:

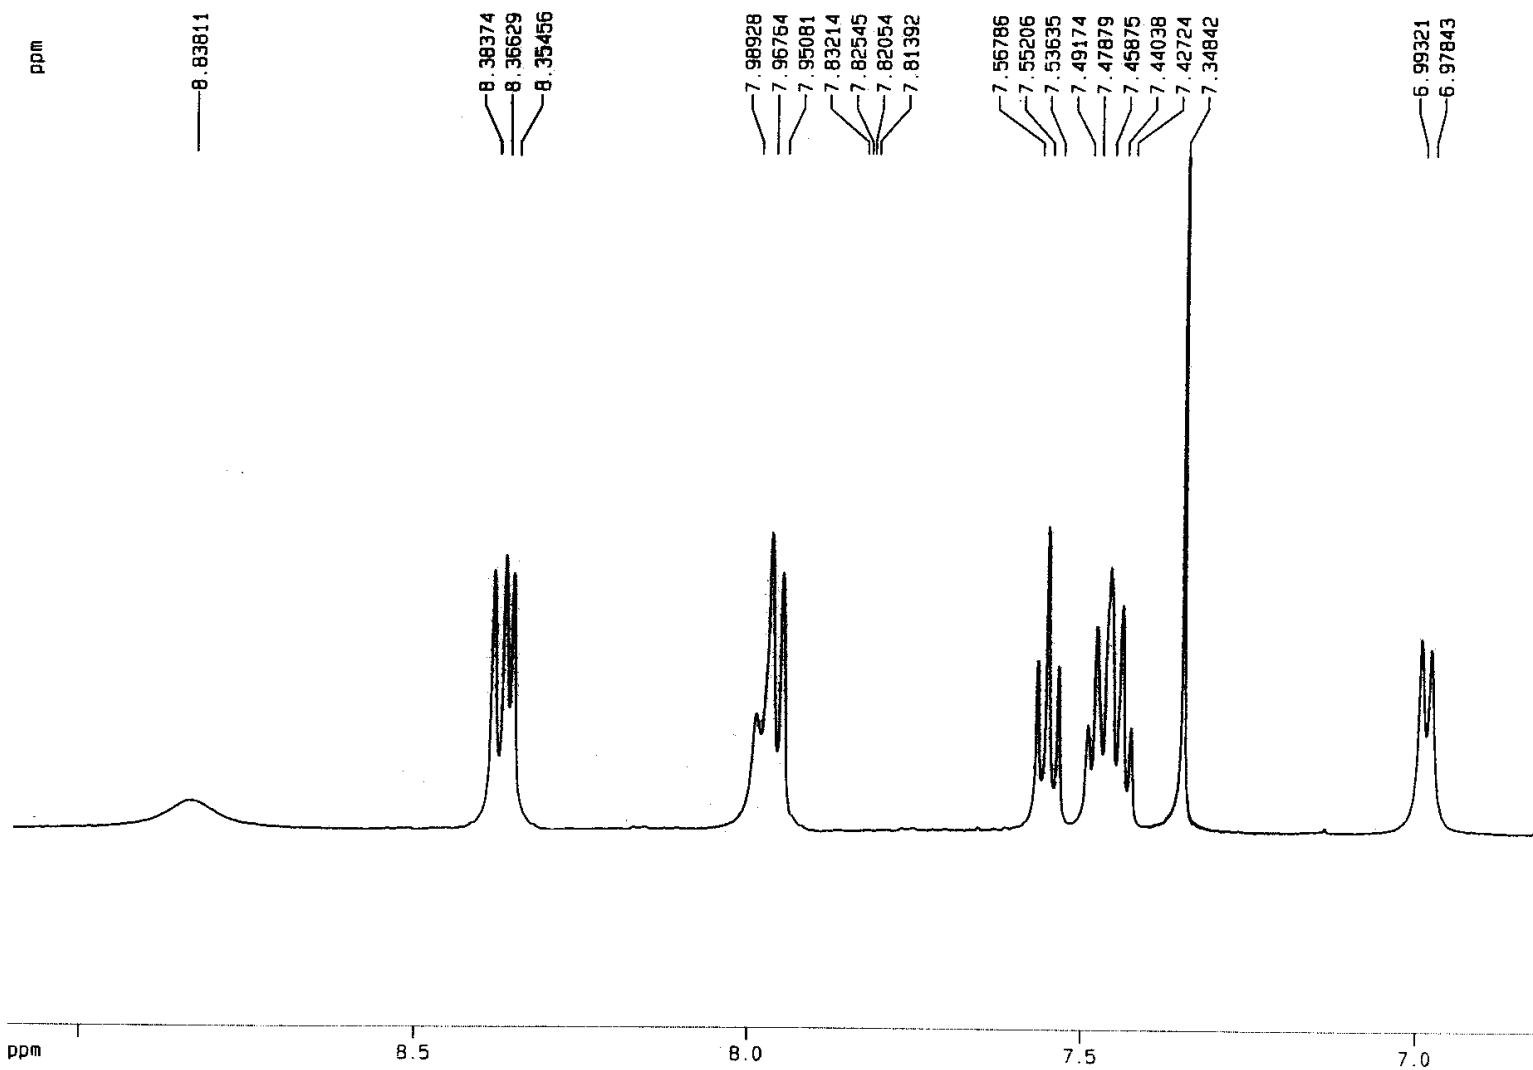

Partial  $^1\text{H}$  NMR with *dl*-malic acid and **1**:

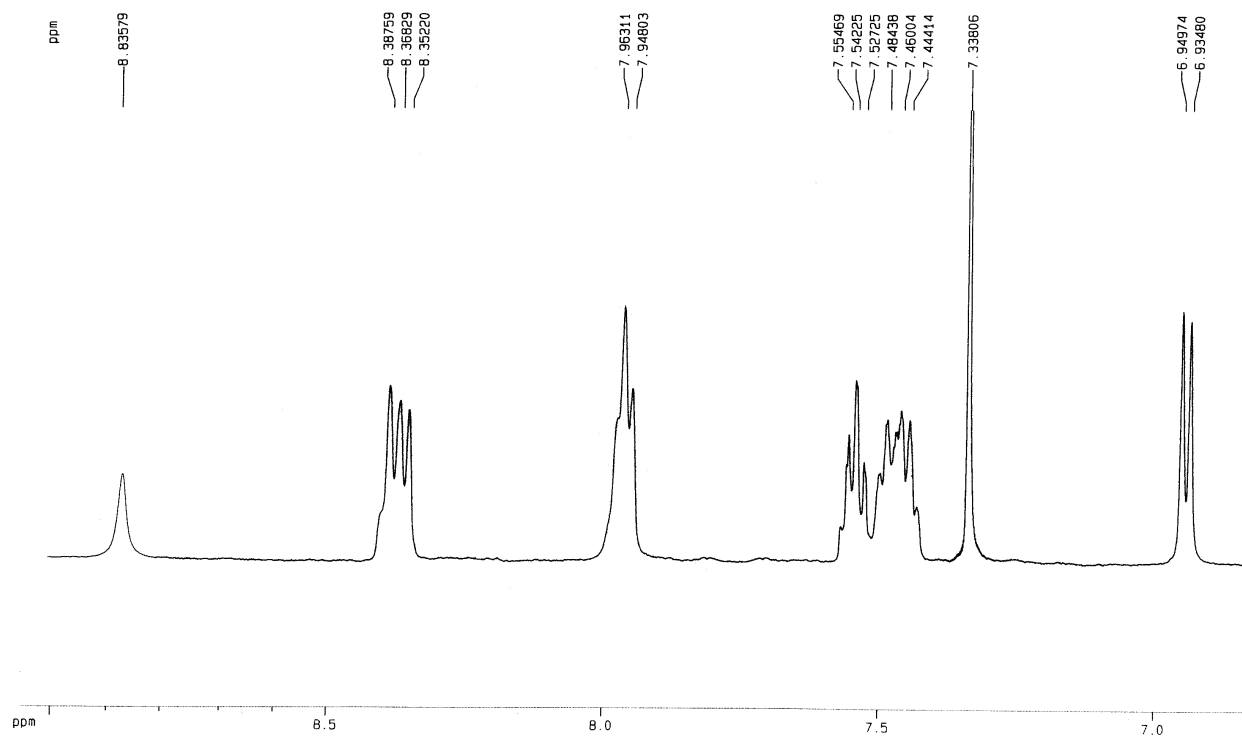

Partial  $^1\text{H}$  NMR of **1** with fumaric acid:

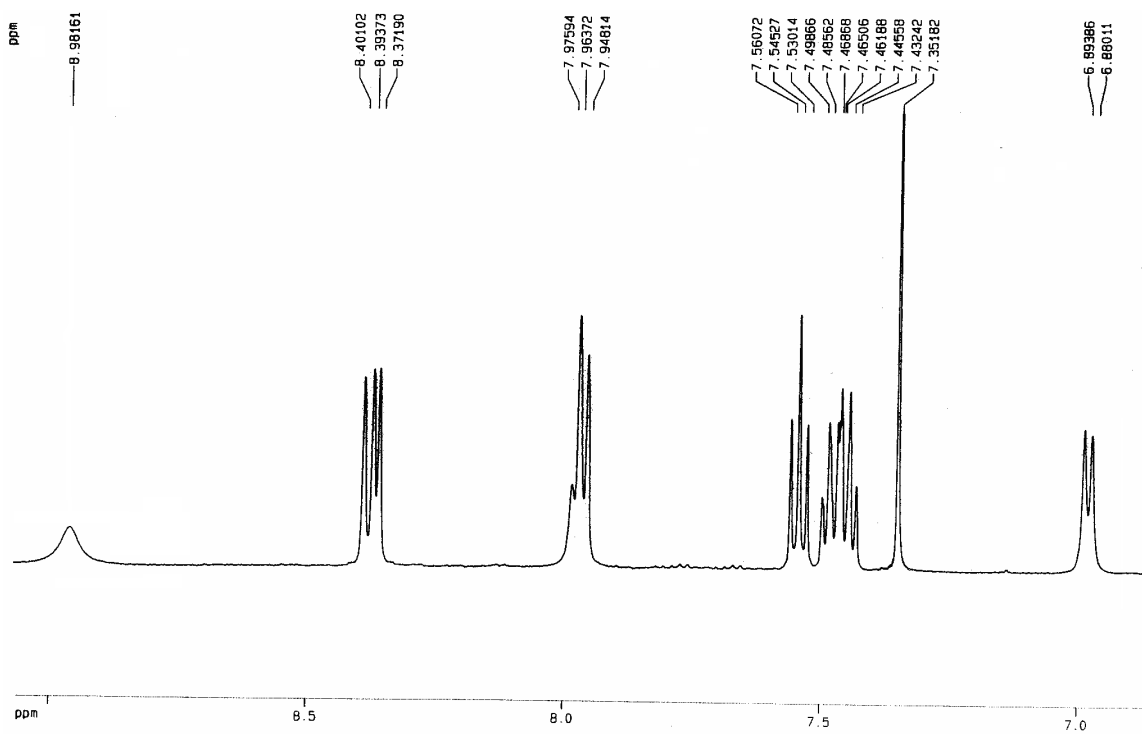

Partial  $^1\text{H}$  NMR with citric acid

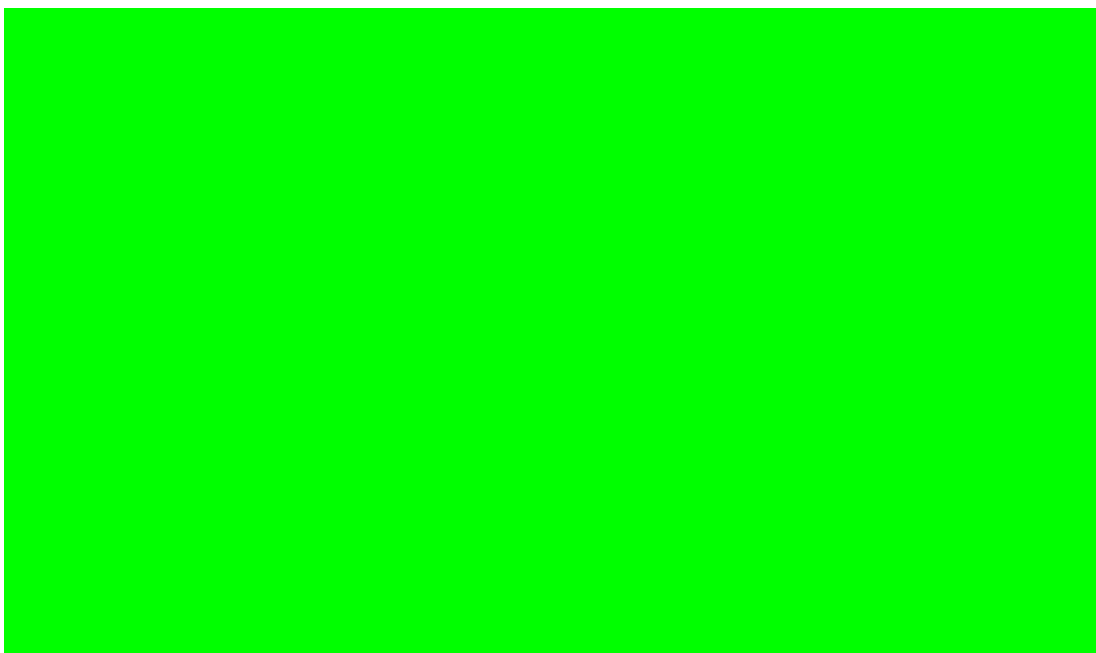

Partial  $^1\text{H}$  NMR of **1** with TFA (1 equivalent):

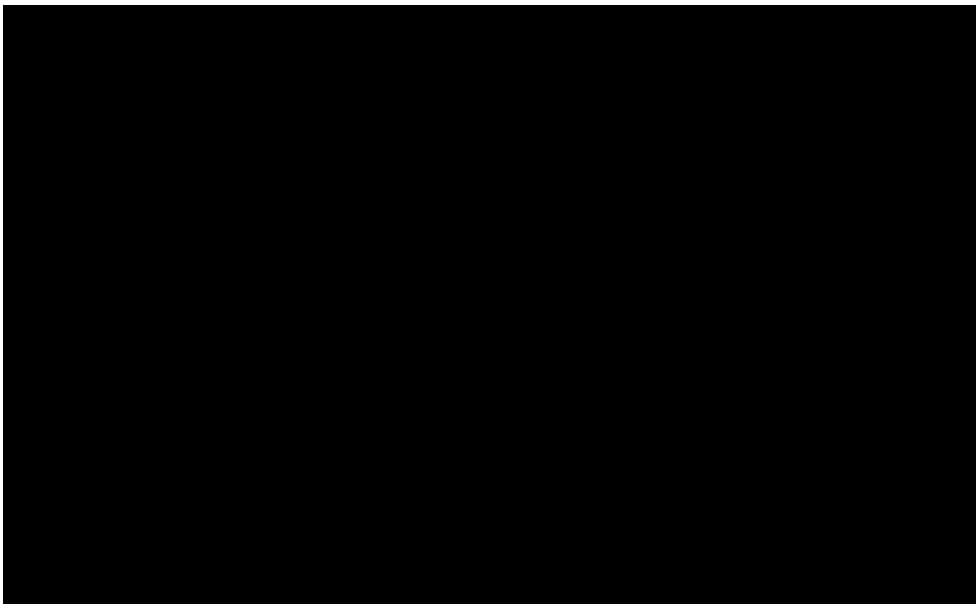

Partial  $^1\text{H}$  NMR of **1** with TFA (3 equivalent):

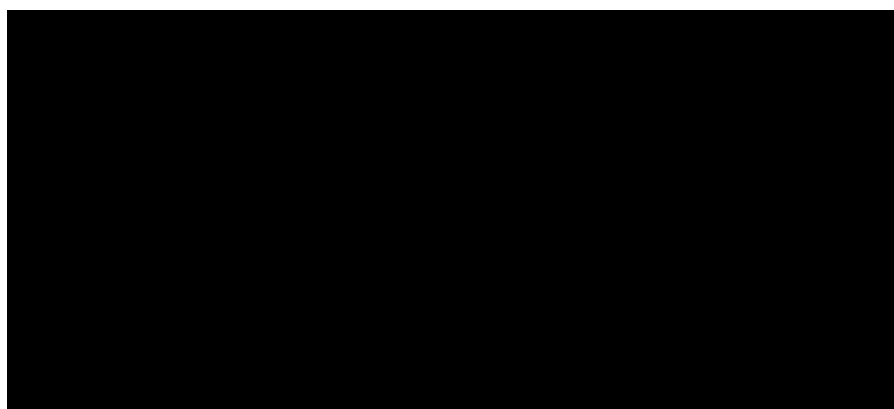



Partial  $^1\text{H-NMR}$  of **2** with succinic acid:

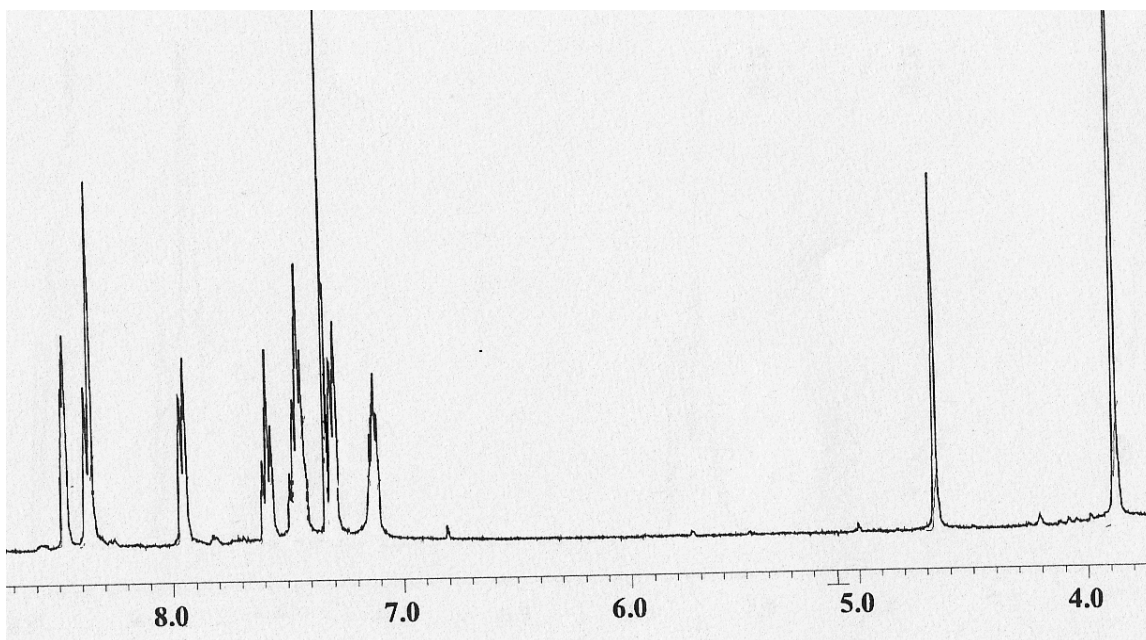

Partial  $^1\text{H-NMR}$  of **2** with maleic acid:

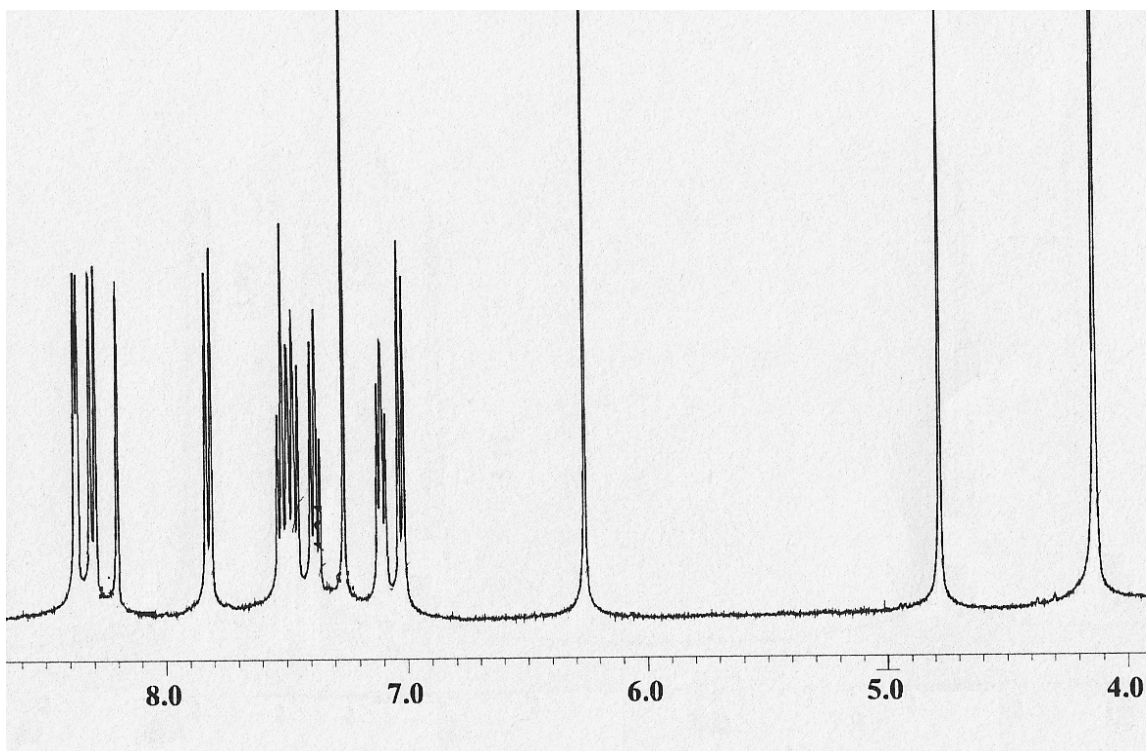

Partial  $^1\text{H-NMR}$  of **2** with fumaric acid:

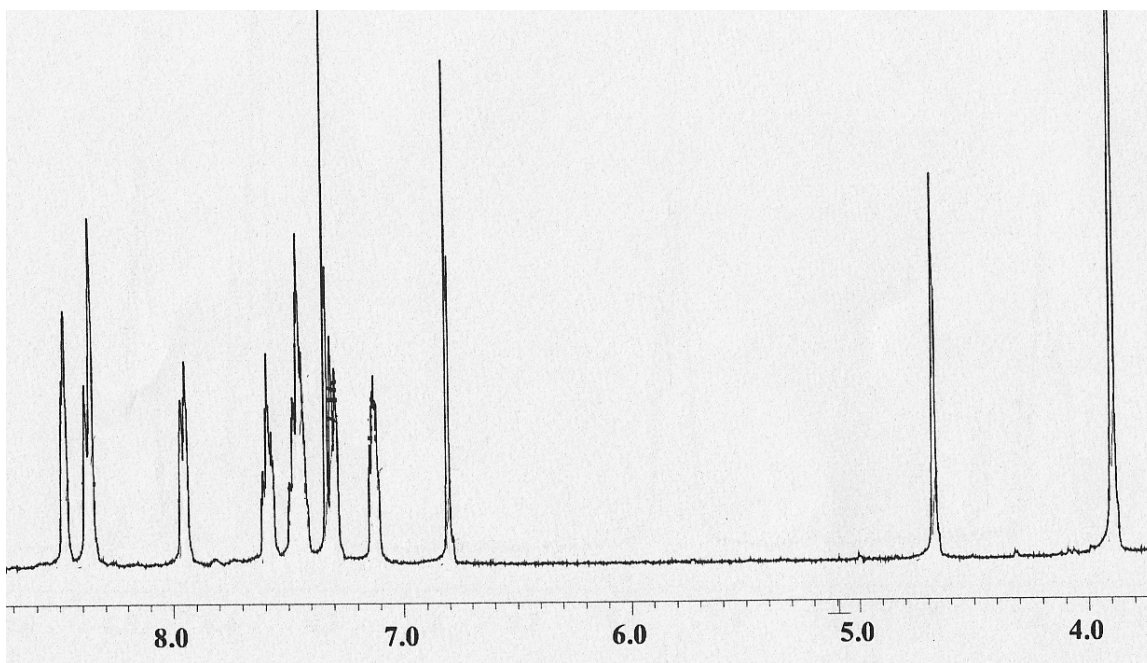

Partial  $^1\text{H-NMR}$  of **2** with dl-malic acid:

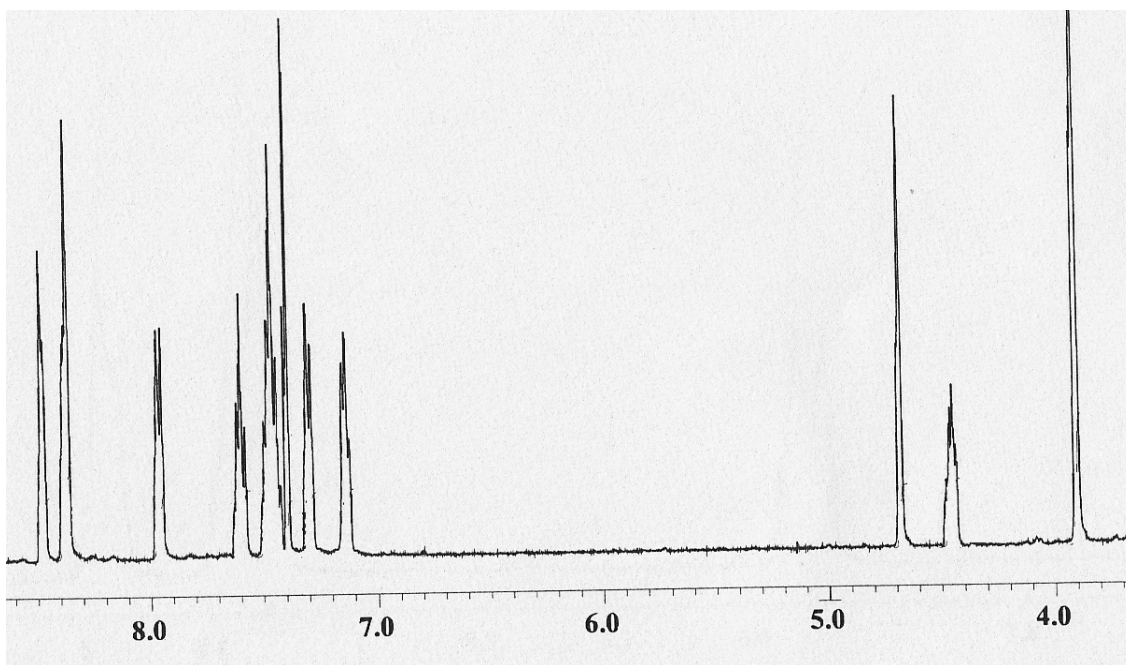

Partial  $^1\text{H-NMR}$  of **2** with citric acid:

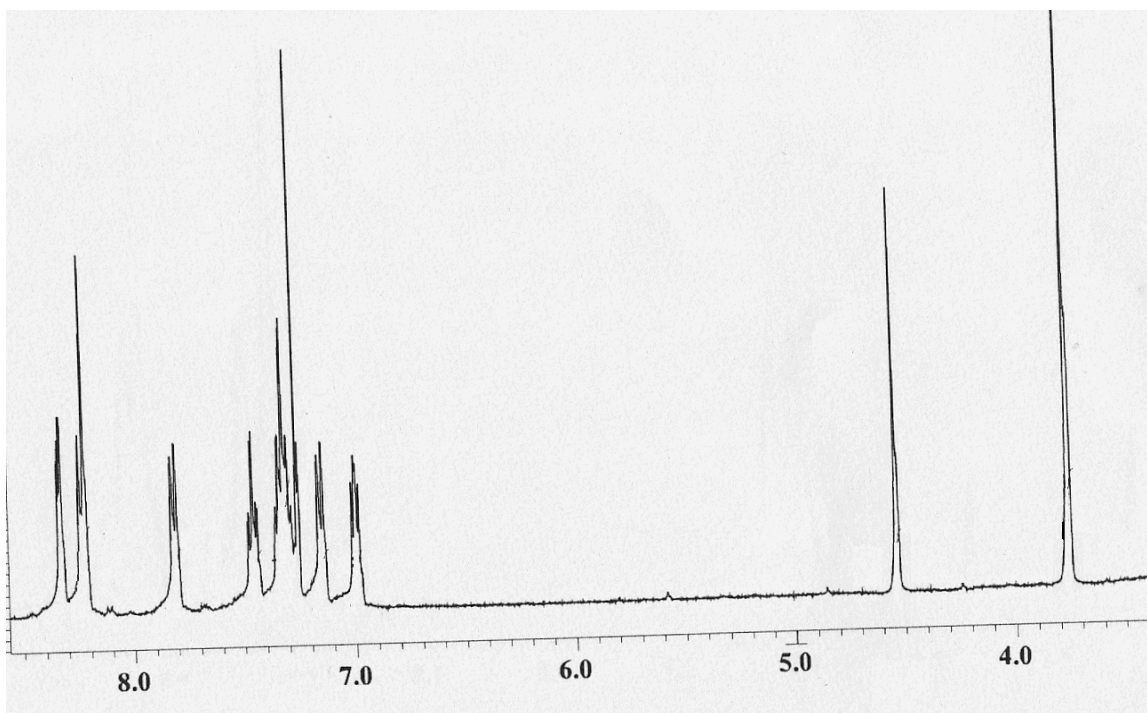

Partial  $^1\text{H-NMR}$  of **2** with TFA (1:1):

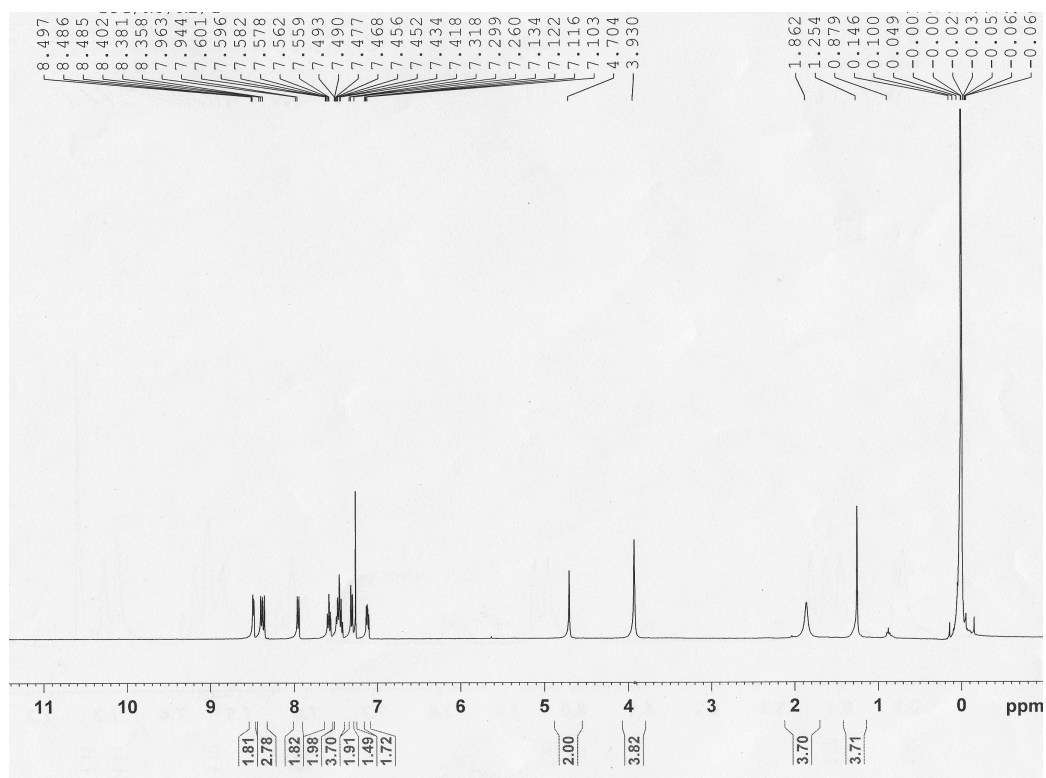

Partial  $^1\text{H-NMR}$  of **2** with TFA (1:3):

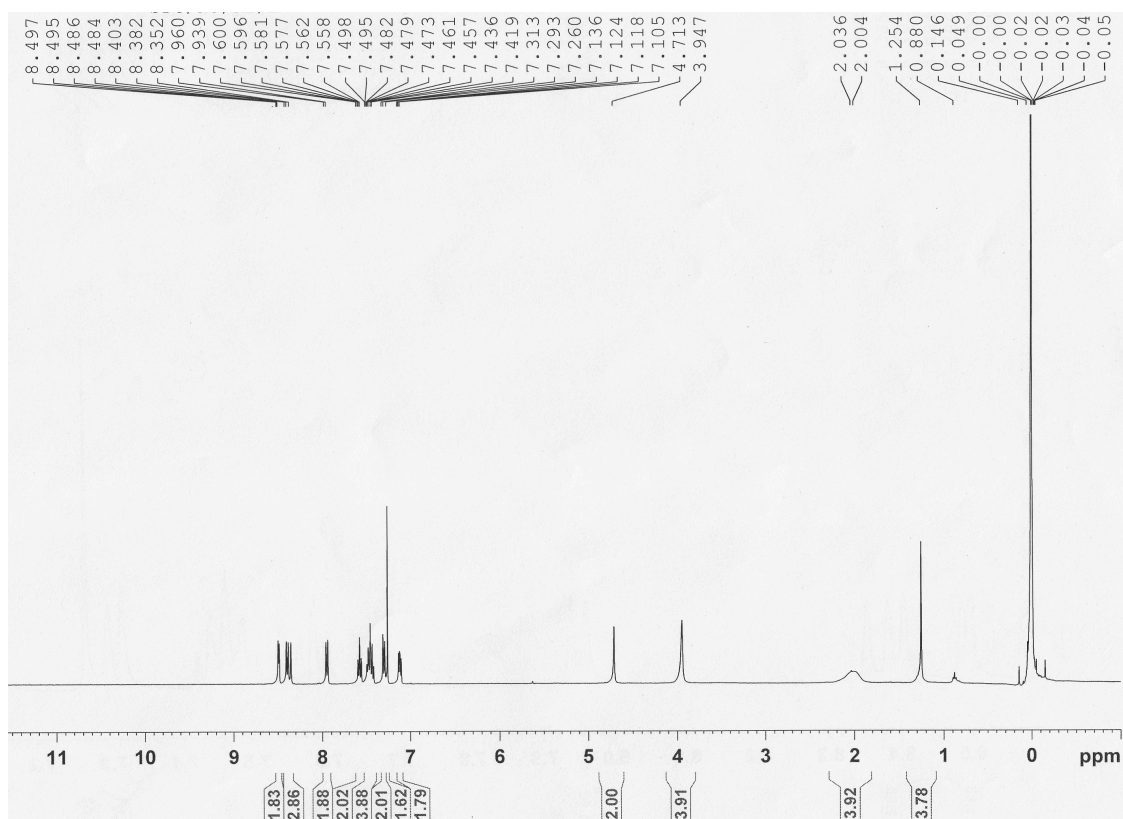

$^1\text{H NMR}$  of **1** with dl-malate (1:1):

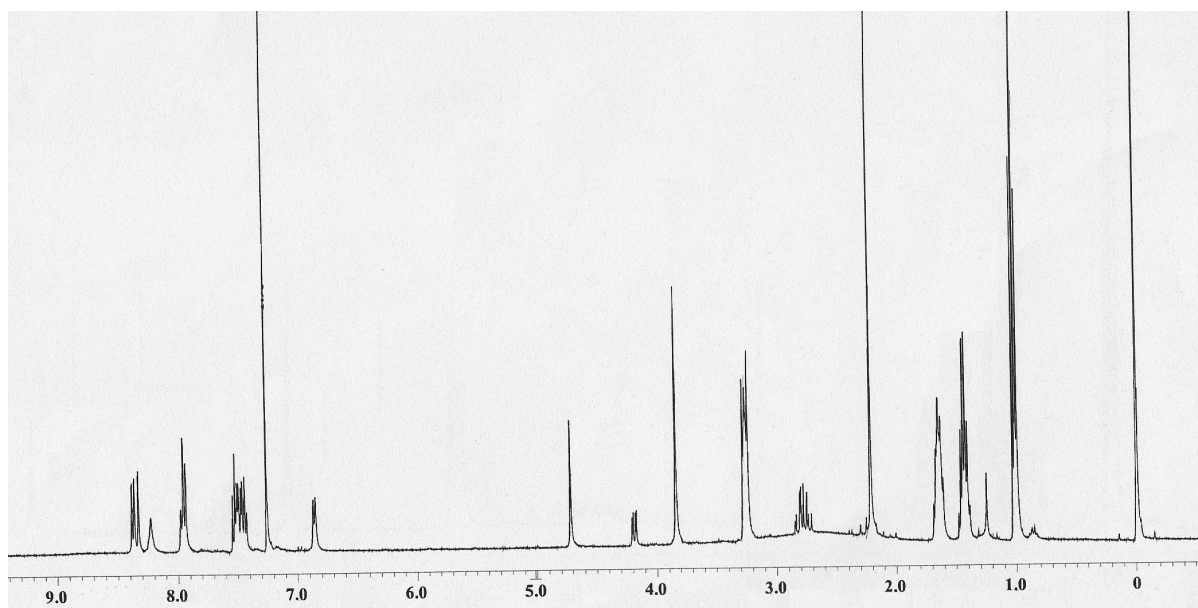

$^1\text{H}$  NMR of **1** with fumarate (1:1):

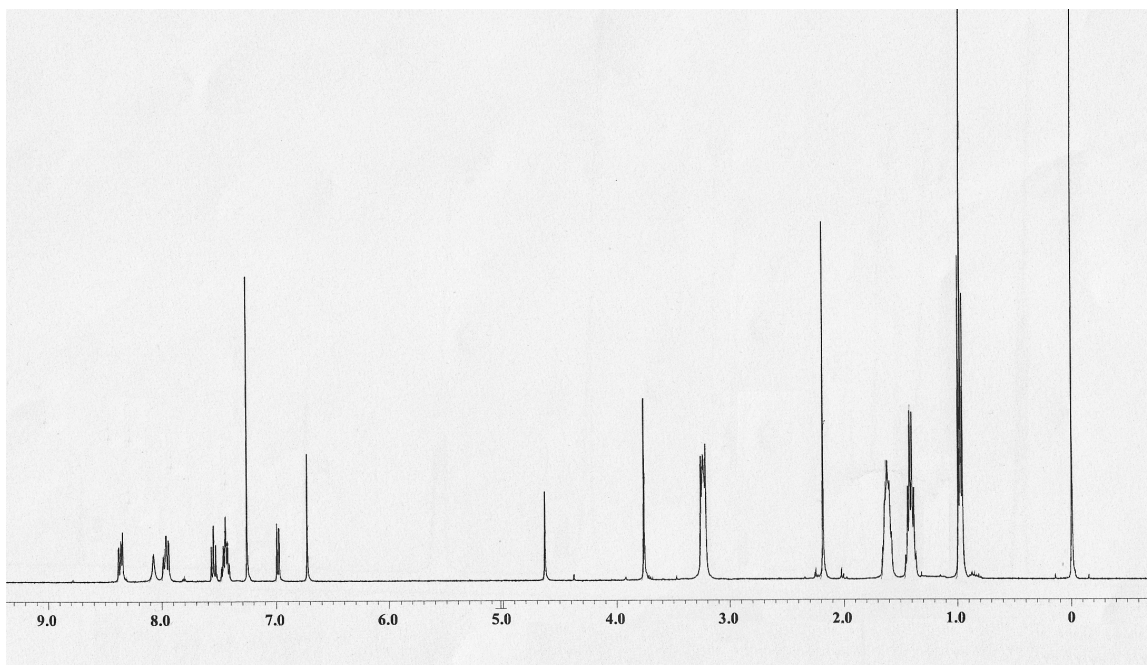

$^1\text{H}$  NMR of **1** with succinate (1:1):

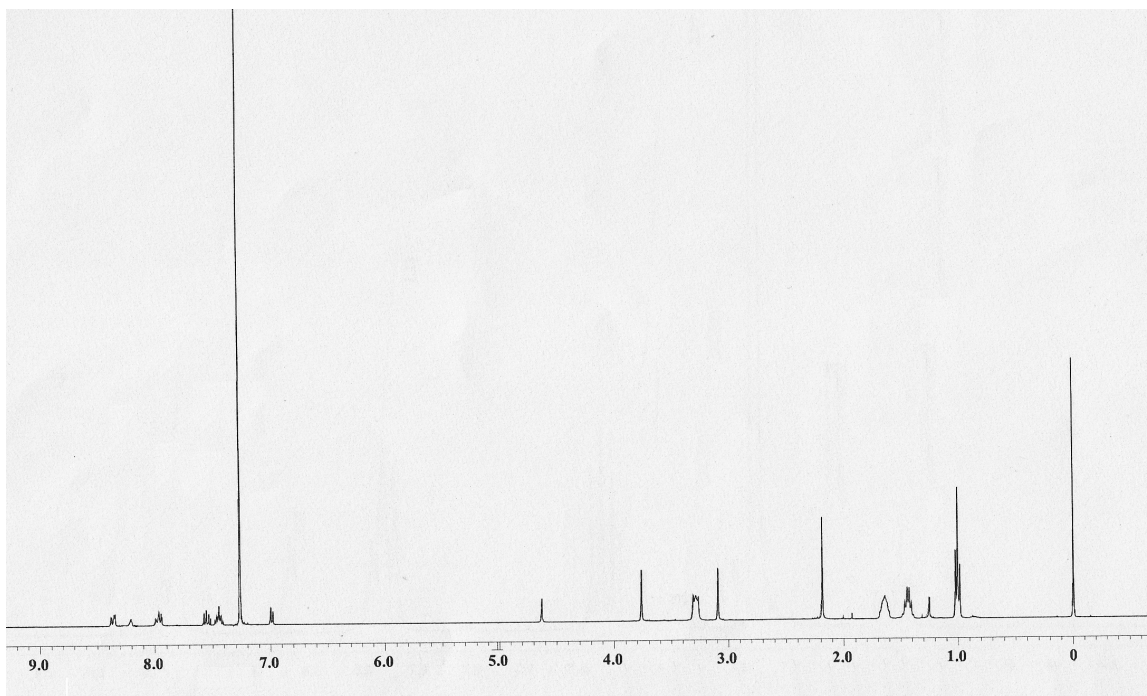

$^1\text{H}$  NMR of **1** with citrate (1:1):

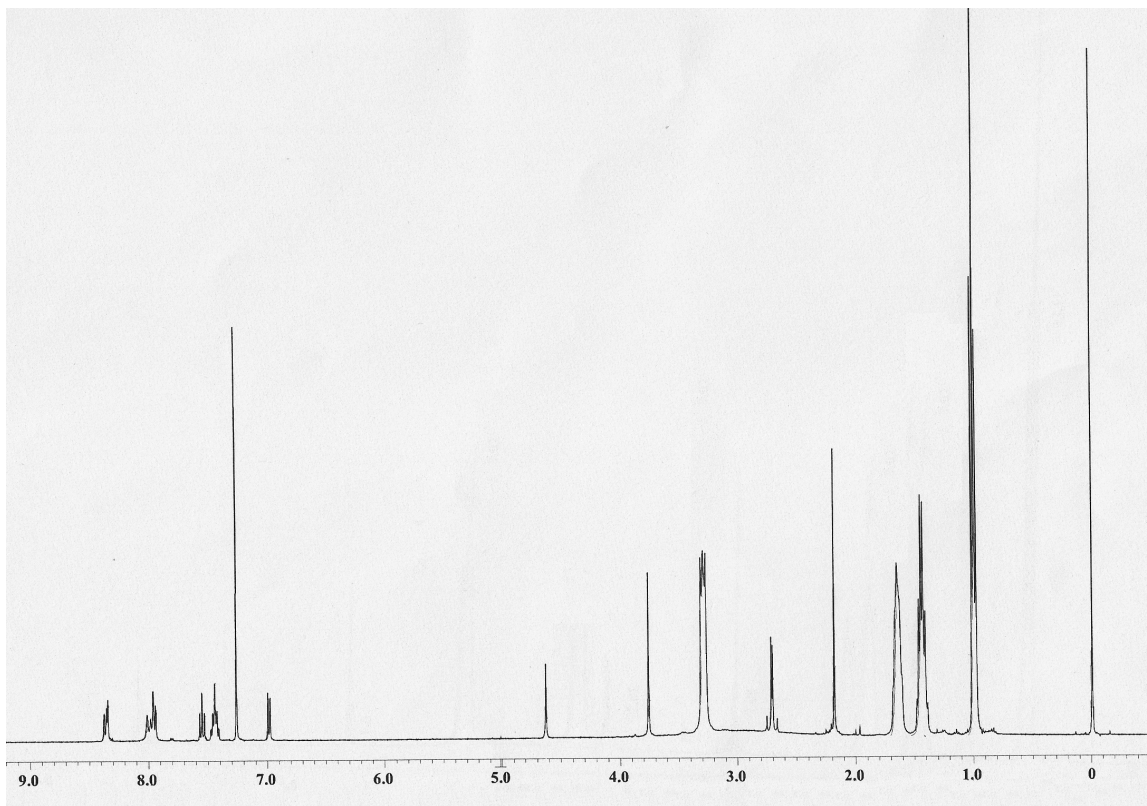

$^1\text{H}$  NMR of **1** with maleate (1:1):

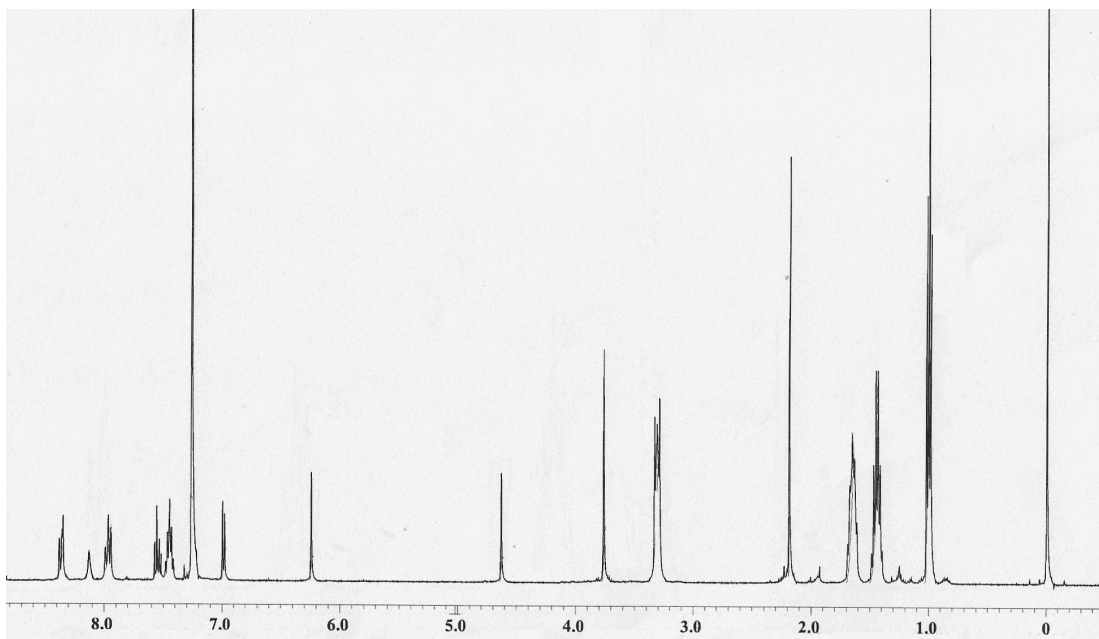

$^1\text{H-NMR}$  of **1** with monotetrabutylammonium salt of succinic acid:

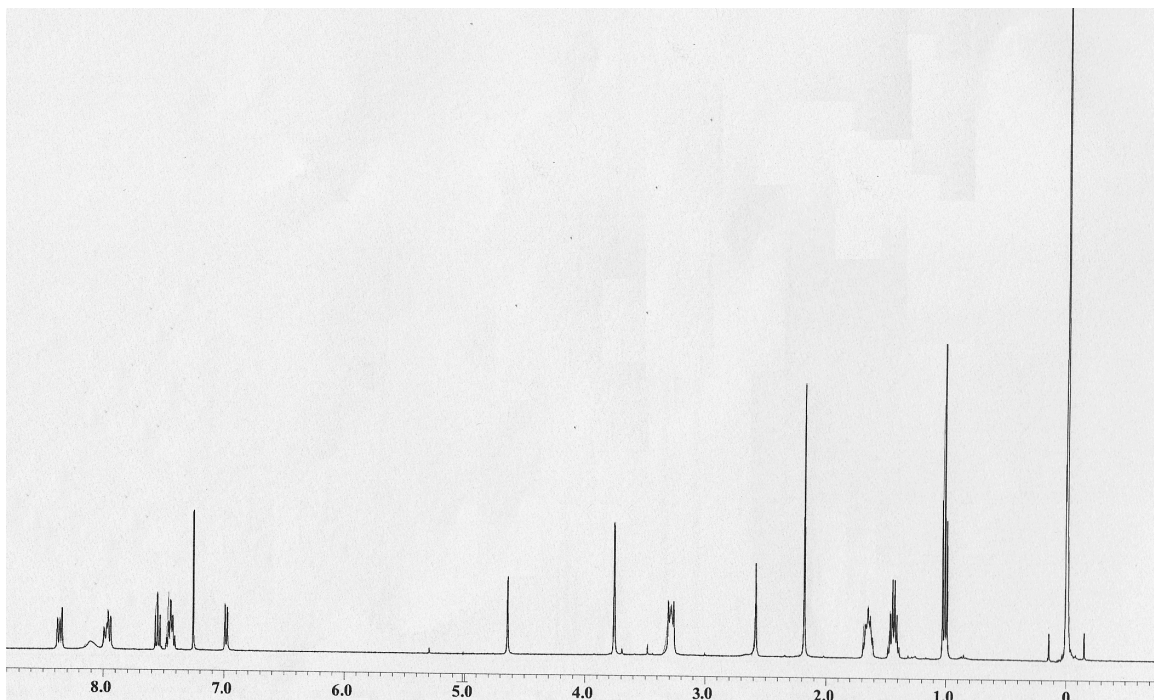

$^1\text{H-NMR}$  of **1** with monotetrabutylammonium salt of citric acid:

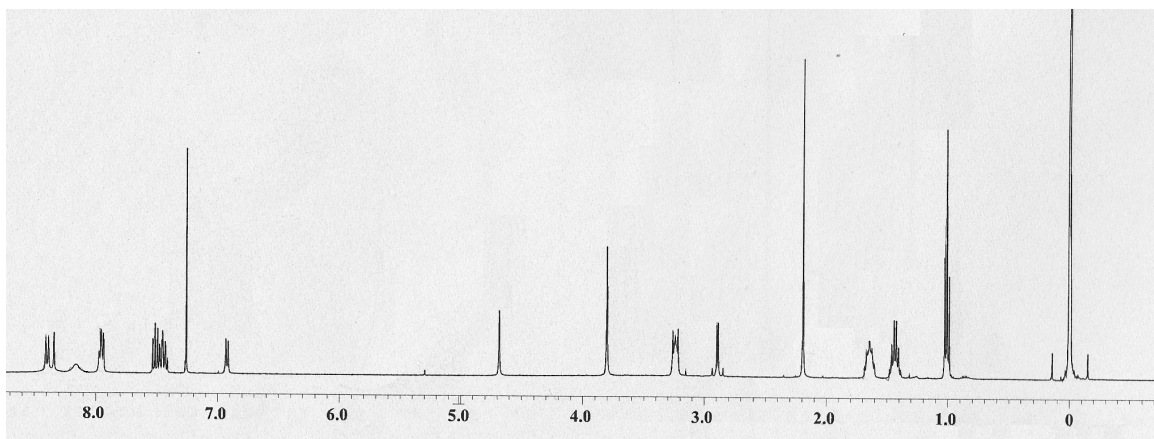

$^1\text{H-NMR}$  of **1** with monotetrabutylammonium salt of dl-malic acid:

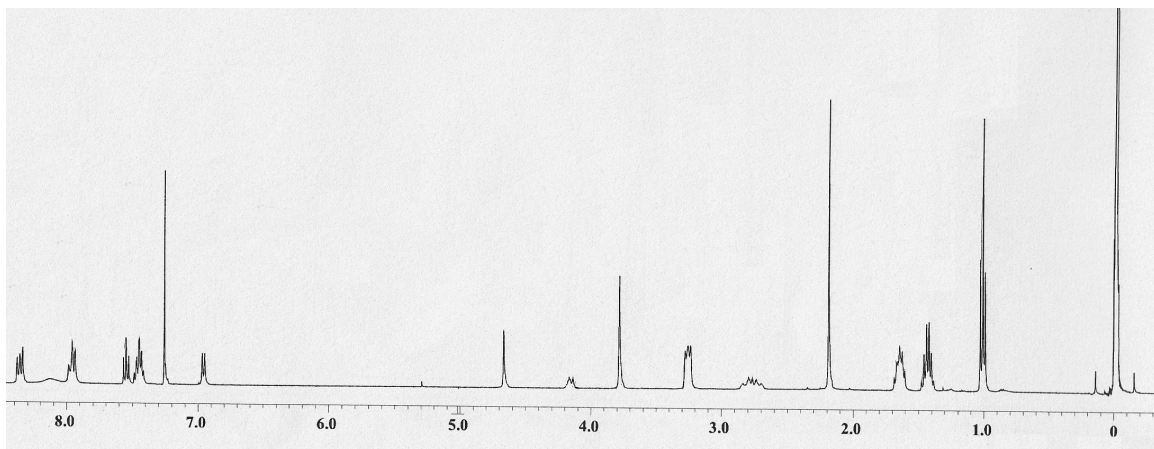

$^1\text{H-NMR}$  of **1** with monotetrabutylammonium salt of maleic acid:

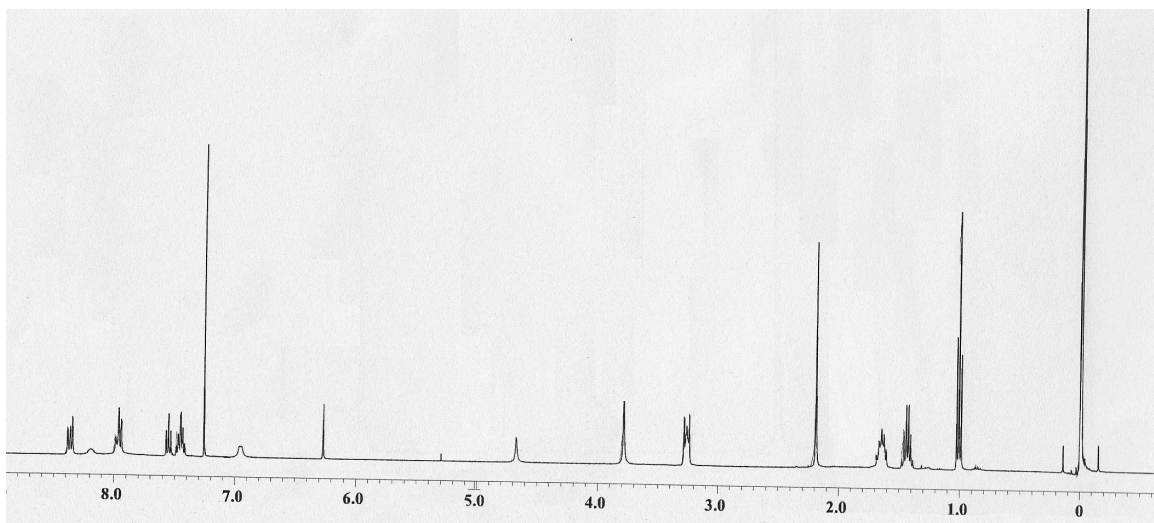

$^1\text{H-NMR}$  of **1** with monotetrabutylammonium salt of fumaric acid:

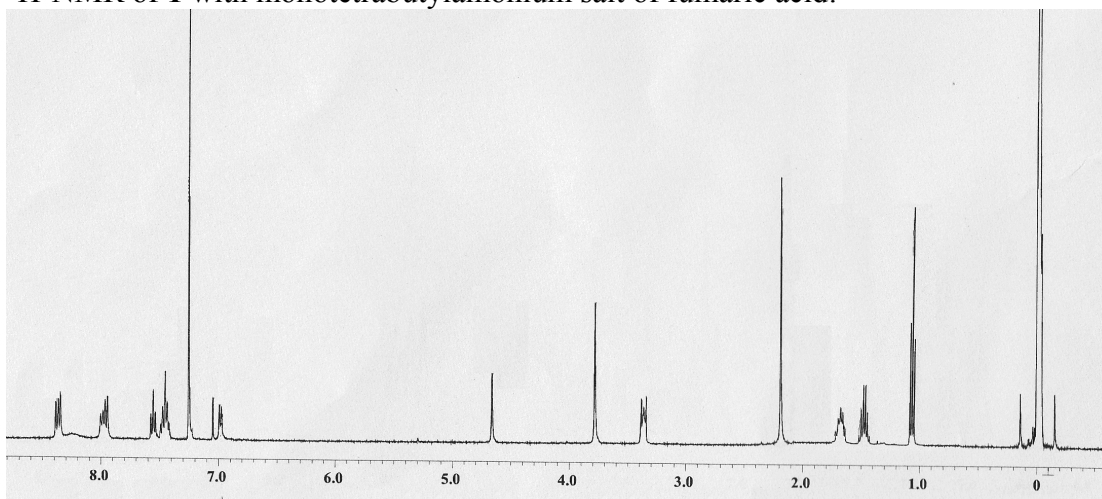



Change of absorbance upon addition of citric acid to **1** ( $c = 4.0 \times 10^{-5} \text{ M}$ ).

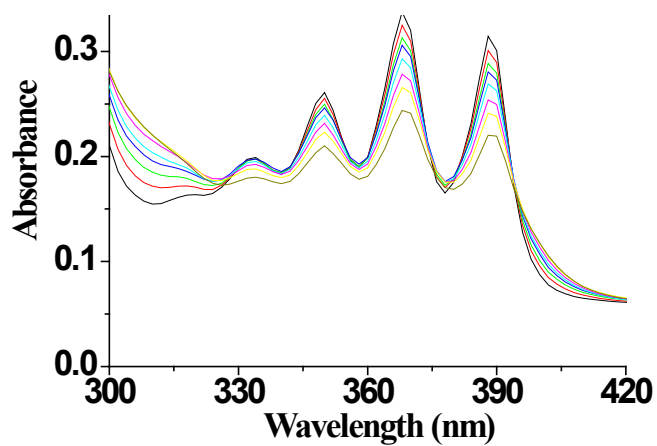

Change of absorbance upon addition of fumaric acid to **1** ( $c = 4.0 \times 10^{-5} \text{ M}$ ).

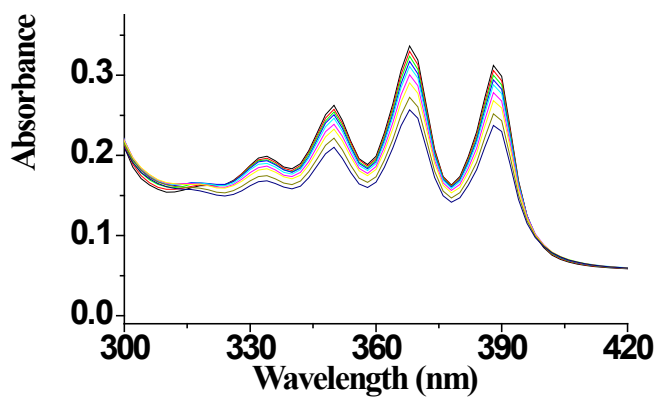

Change of absorbance upon addition of Succinic acid to **1** ( $c = 4.0 \times 10^{-5} \text{ M}$ ).

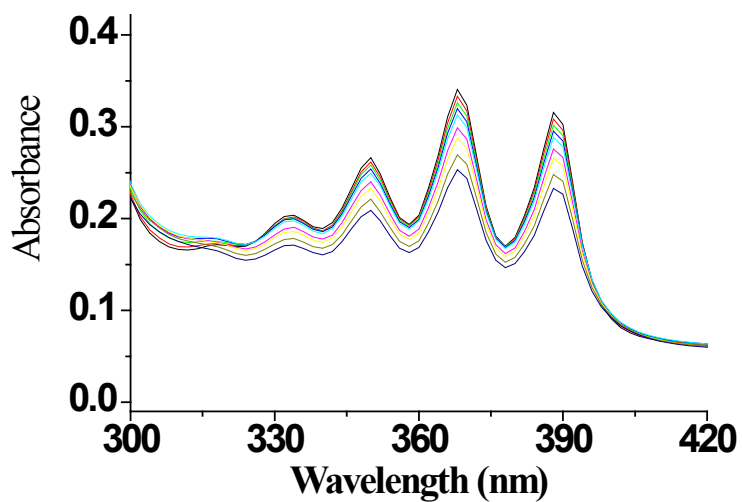

Change of absorbance upon addition of dl-malic acid to **1** ( $c = 4.0 \times 10^{-5}$  M).

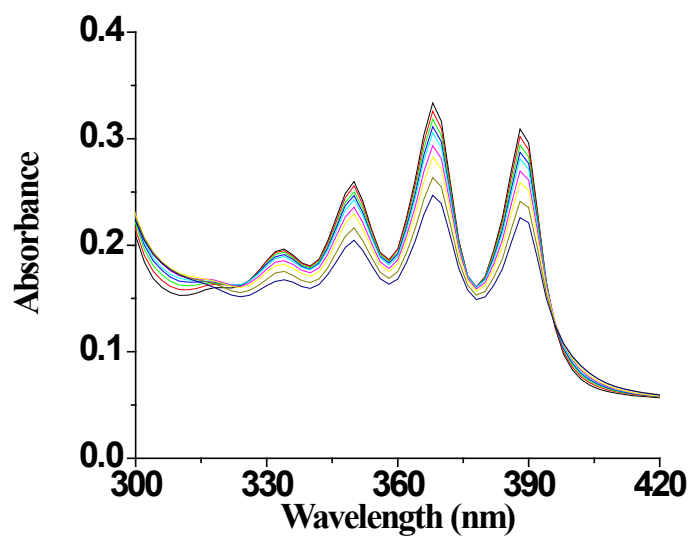

Change of absorbance upon addition of one equivalent of maleic acid to **1** ( $c = 4.0 \times 10^{-5}$  M).

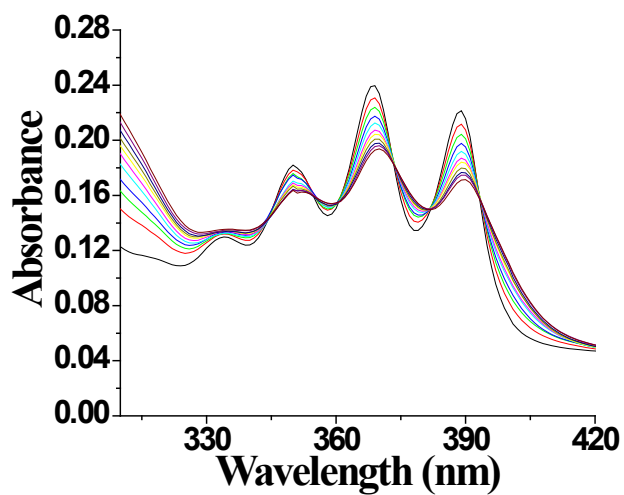

Change of absorbance upon addition of three equivalent of maleic acid to **1** ( $c = 4.0 \times 10^{-5}$  M).

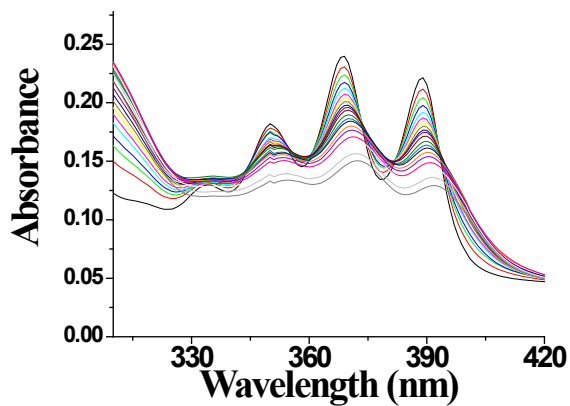

Change of UV upon addition of one equivalent TFA to **1**

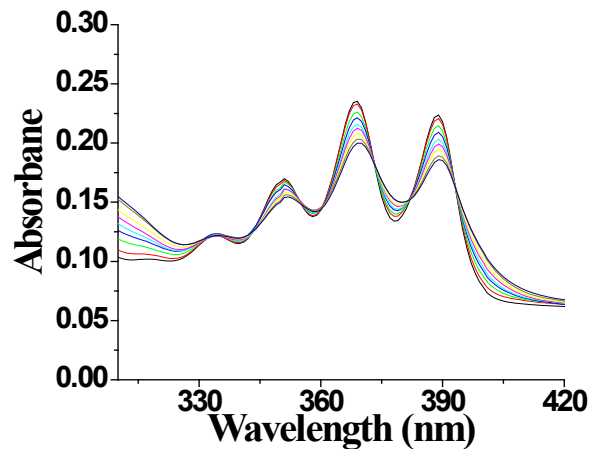

Change of UV upon addition of three equivalents TFA to **1**

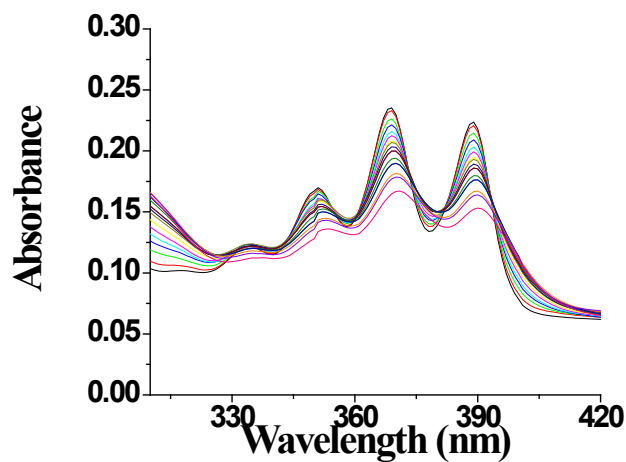

(a) Job plot and (b) fluorescence titration curve of **1** with acids

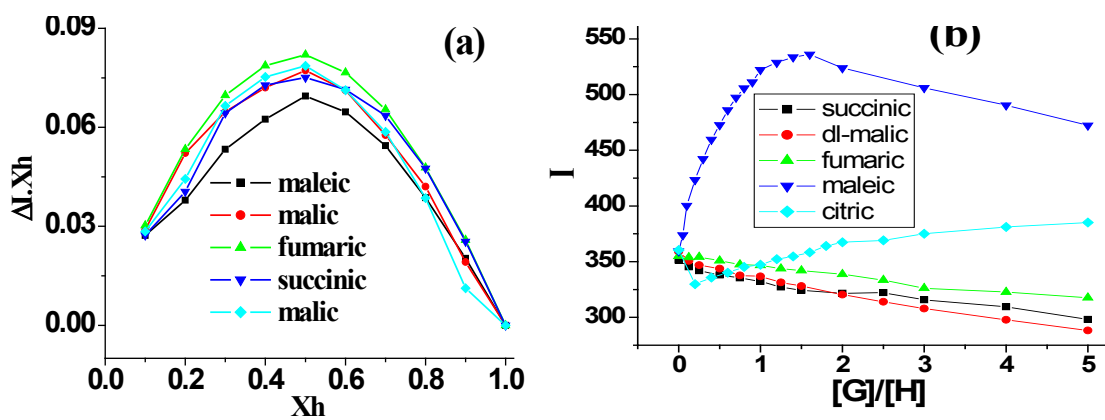

Fluorescence titration spectra of succinic acid with **1**:

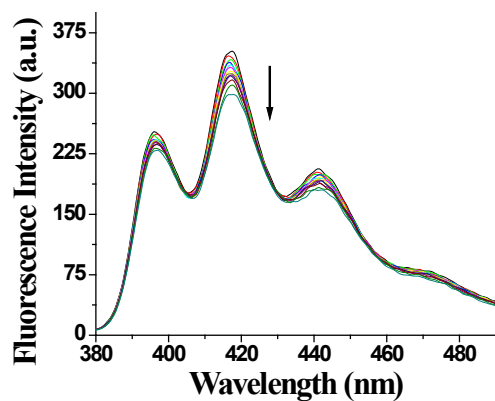

Fluorescence titration spectra of *dl*-malic acid with **1**:

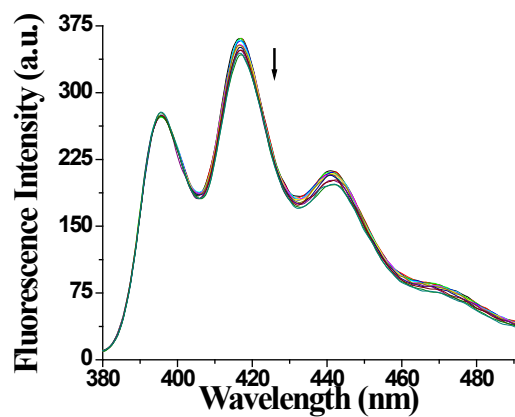

Fluorescence titration spectra of fumaric acid with **1**:

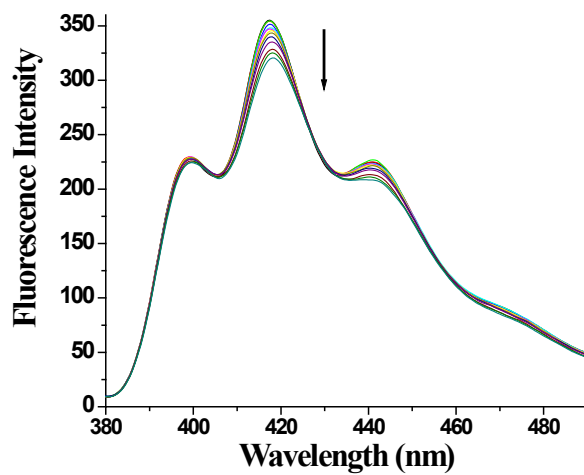

Fluorescence titration spectra of citric acid with **1**:

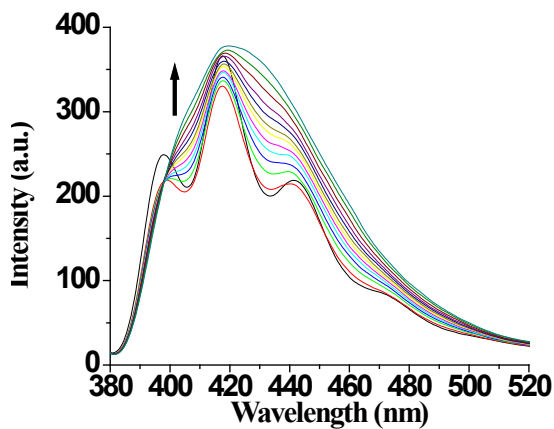

Fluorescence titration spectra of the sensor with TFA:

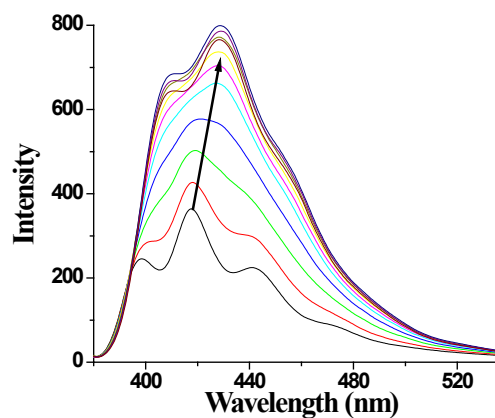

Linear Regression for **1** with succinic acid:

$$Y = A + B * X$$

| Parameter | Value   | Error   |         |  |
|-----------|---------|---------|---------|--|
| A         | 5.69351 | 0.68489 |         |  |
| B         | 4.25681 | 0.14761 |         |  |
| R         | SD      | N       | P       |  |
| 0.99404   | 1.67561 | 12      | <0.0001 |  |

Linear Regression for **1** with dl-malic acid:

$$Y = A + B * X$$

| Parameter | Value   | Error   |
|-----------|---------|---------|
| A         | 2.74266 | 0.55066 |
| B         | 4.34273 | 0.18958 |

| R       | SD      | N  | P       |
|---------|---------|----|---------|
| 0.99246 | 1.04044 | 10 | <0.0001 |

Linear Regression for **1** with fumaric acid:

$$Y = A + B * X$$

| Parameter | Value     | Error   |
|-----------|-----------|---------|
| A         | -24.38899 | 4.8446  |
| B         | 27.88158  | 1.09309 |

| R       | SD       | N  | P       |
|---------|----------|----|---------|
| 0.99315 | 11.85242 | 11 | <0.0001 |

Linear Regression for **1** with maleic acid:

$$Y = A + B * X$$

| Parameter | Value   | Error   |
|-----------|---------|---------|
| A         | 1.55365 | 0.06063 |
| B         | 0.29573 | 0.0071  |

| R       | SD      | N  | P       |
|---------|---------|----|---------|
| 0.99656 | 0.16253 | 14 | <0.0001 |

Change in the absorbance of **1** with citrate:

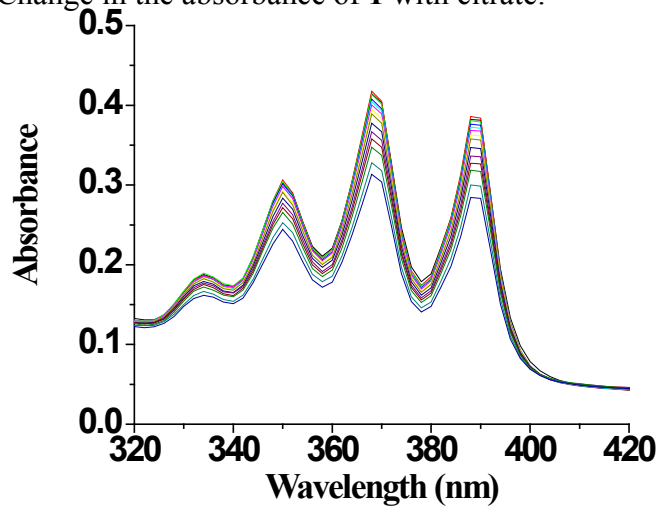

Change in the fluorescence of **1** with citrate:

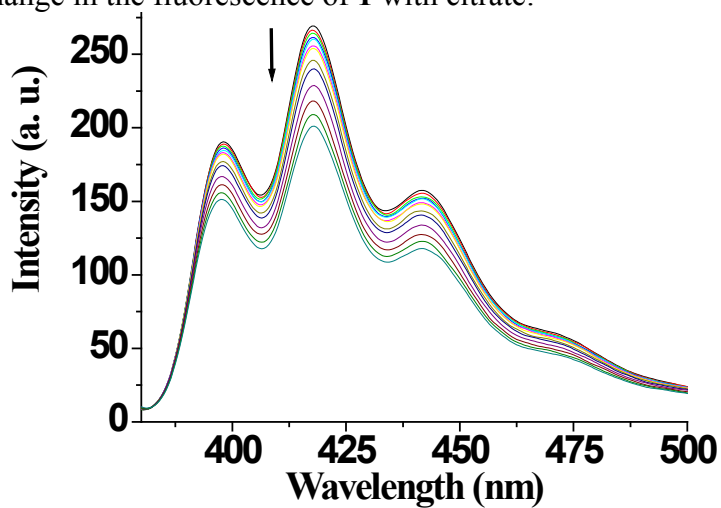

Change in the absorbance of **1** with dl-malate:

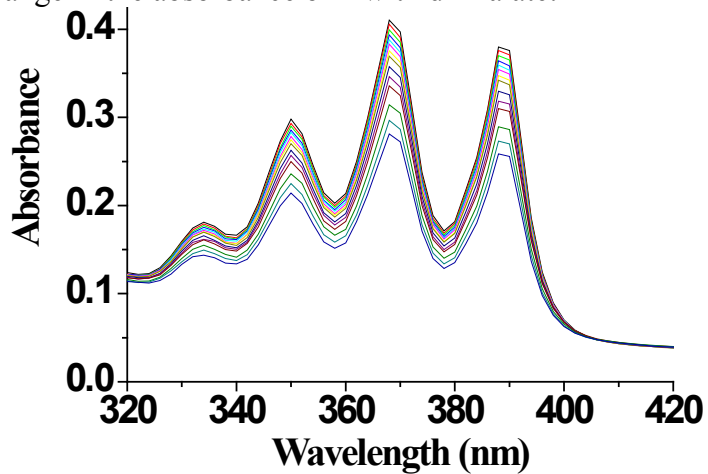

Change in the fluorescence of **1** with dl-malate:

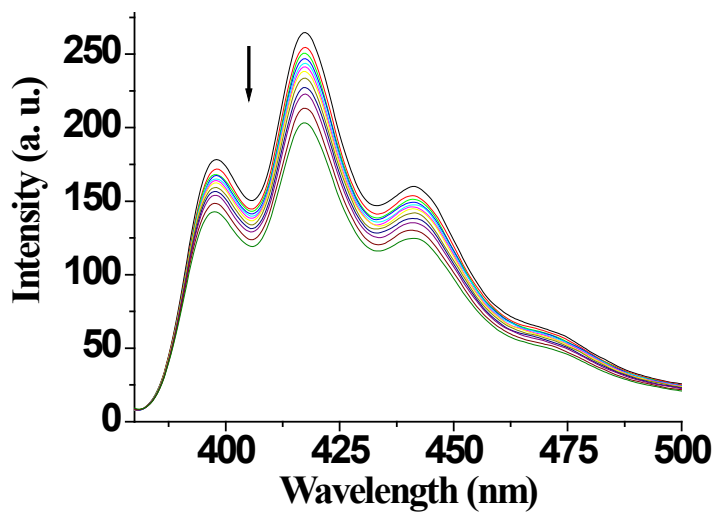

Change in the absorbance of **1** with fumarate:

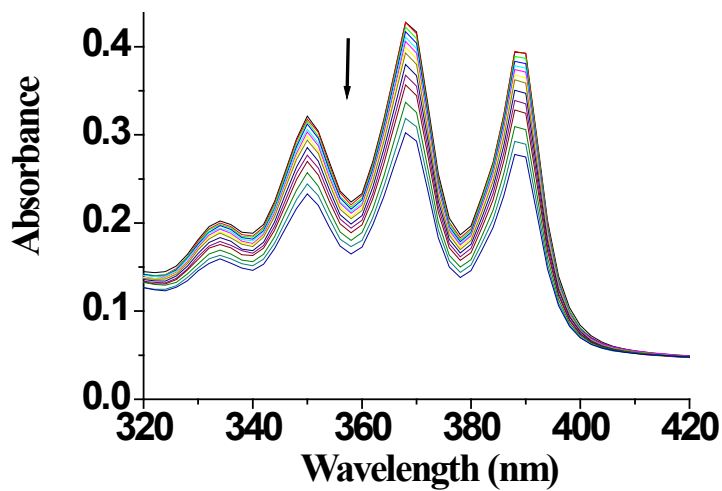

Change in the fluorescence of **1** with fumarate:

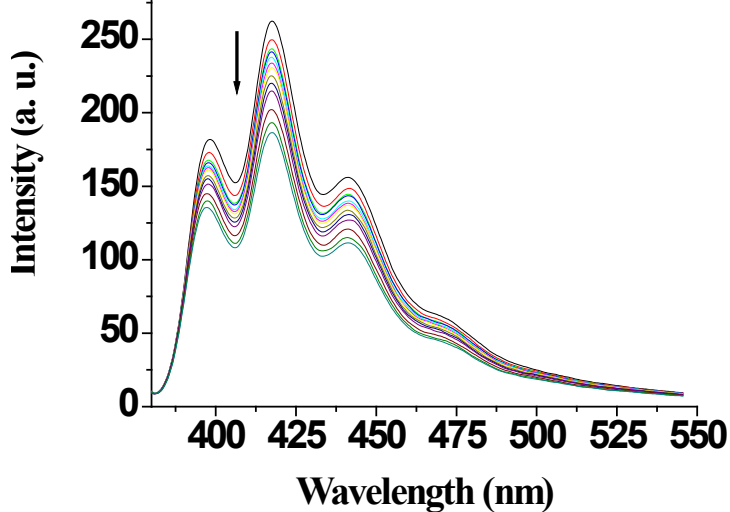



Change in the absorbance of **1** with maleate:

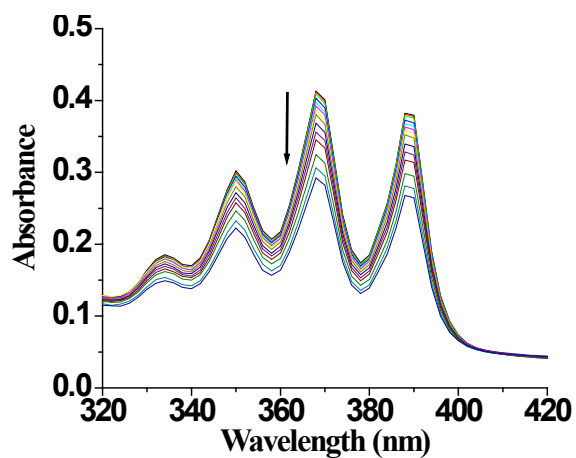

Change in the fluorescence of **1** with maleate:

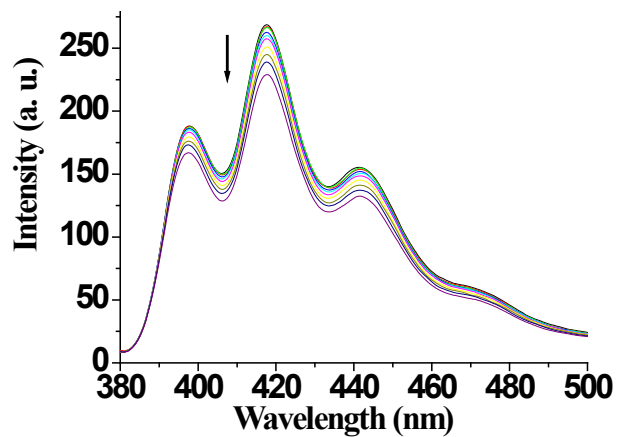

Change in the absorbance of **1** with succinate

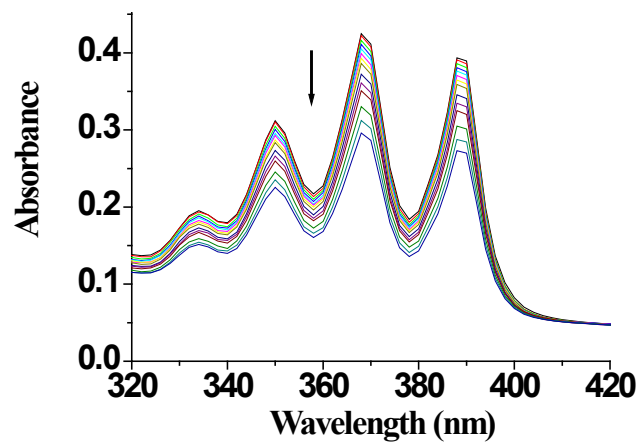

Change in the fluorescence of **1** with succinate

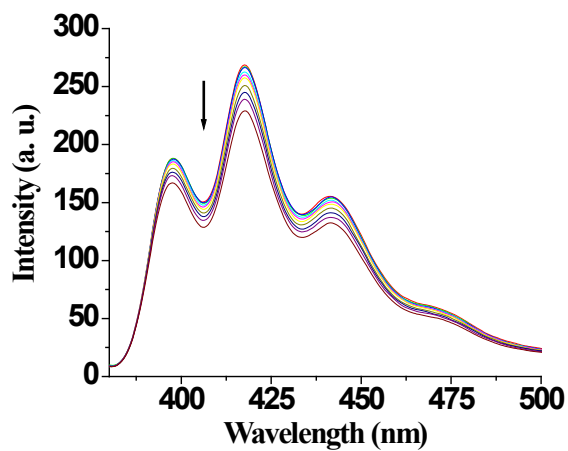

Binding constant calculation plot of **1** with guest anions:

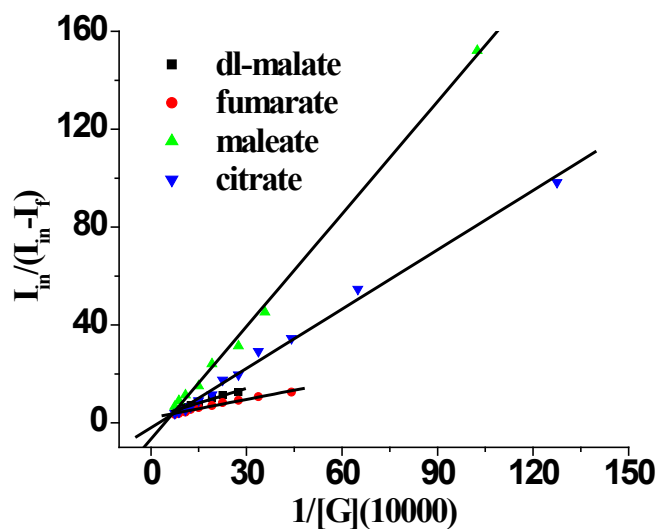

Linear Regression for **1** with dl-malate:

$$Y = A + B * X$$

| Parameter | Value   | Error   |
|-----------|---------|---------|
| A         | 2.08096 | 0.44697 |
| B         | 0.40062 | 0.02518 |

---

| R       | SD      | N | P       |
|---------|---------|---|---------|
| 0.99026 | 0.41721 | 7 | <0.0001 |

---

Linear Regression for **1** with fumarate:

$$Y = A + B * X$$

| Parameter | Value   | Error   |
|-----------|---------|---------|
| A         | 2.03198 | 0.29489 |
| B         | 0.25159 | 0.01275 |

---

| R       | SD      | N  | P       |
|---------|---------|----|---------|
| 0.98989 | 0.45682 | 10 | <0.0001 |

---

Linear Regression for **1** with maleate:

$$Y = A + B * X$$

| Parameter | Value    | Error   |
|-----------|----------|---------|
| A         | -6.64544 | 1.32263 |
| B         | 1.53292  | 0.03233 |

---

| R       | SD      | N | P       |
|---------|---------|---|---------|
| 0.99867 | 2.69395 | 8 | <0.0001 |

---

Linear Regression for **1** with citrate:

$$Y = A + B * X$$

Parameter Value Error

---

|   |         |         |
|---|---------|---------|
| A | -1.9575 | 0.94658 |
| B | 0.80795 | 0.0204  |

---

R SD N P

---

|         |         |    |         |
|---------|---------|----|---------|
| 0.99683 | 2.31584 | 12 | <0.0001 |
|---------|---------|----|---------|

---

Table 5: Binding constant of **1** with acids and their anions as tetrabutylammonium salt by fluorescence method

| Entry | Acids    | Binding constant of receptor <b>1</b> ( $M^{-1}$ ) | Anions of acids | Binding constant of receptor <b>1</b> ( $M^{-1}$ ) |
|-------|----------|----------------------------------------------------|-----------------|----------------------------------------------------|
| 1     | succinic | $1.33 \times 10^4$                                 | succinic        | -                                                  |
| 2     | dl-malic | $6.31 \times 10^3$                                 | dl-malic        | $5.19 \times 10^3$                                 |
| 3     | fumaric  | $8.75 \times 10^3$                                 | fumaric         | $8.08 \times 10^3$                                 |
| 4     | maleic   | $5.25 \times 10^4$                                 | maleic          | $4.33 \times 10^3$                                 |
| 5     | citric   | -                                                  | citric          | $2.42 \times 10^3$                                 |

'-' not determined due to irregular change

Job plot of **1** with corresponding carboxylates as their tetrabutylammonium salt:

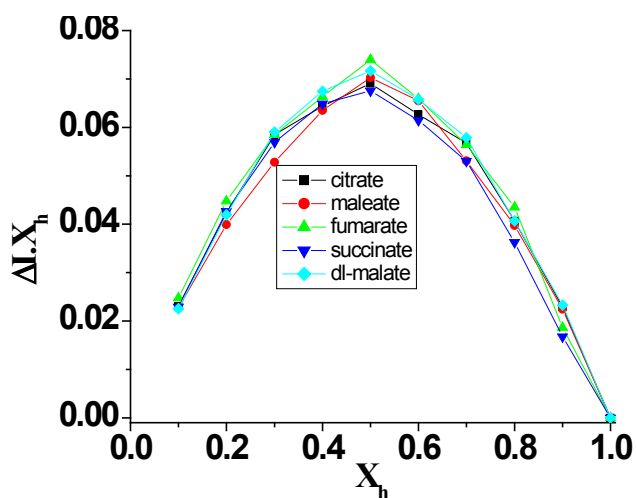

UV-vis titration spectra of **1** with monotetrabutylammonium salt of citric acid:

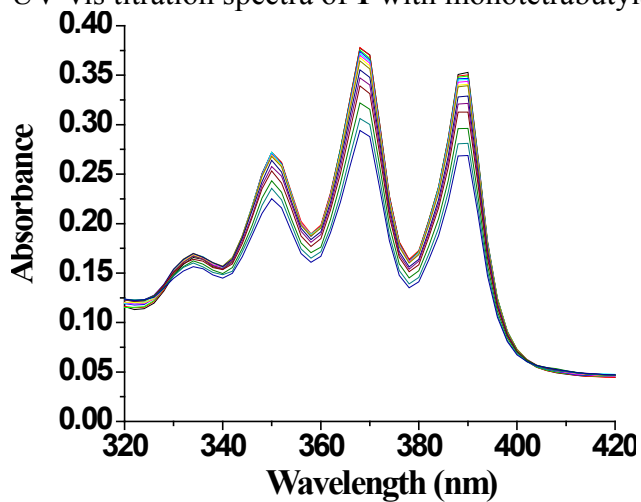

UV-vis titration spectra of **1** with monotetrabutylammonium salt of dl-malic acid:

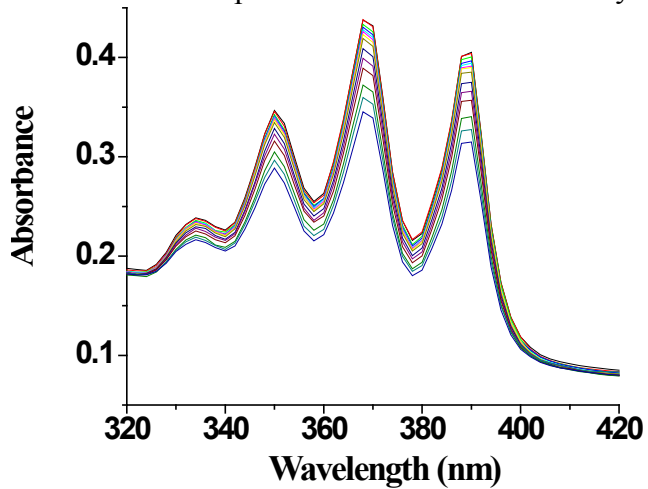

UV-vis titration spectra of **1** with monotetrabutylammonium salt of succinic acid:

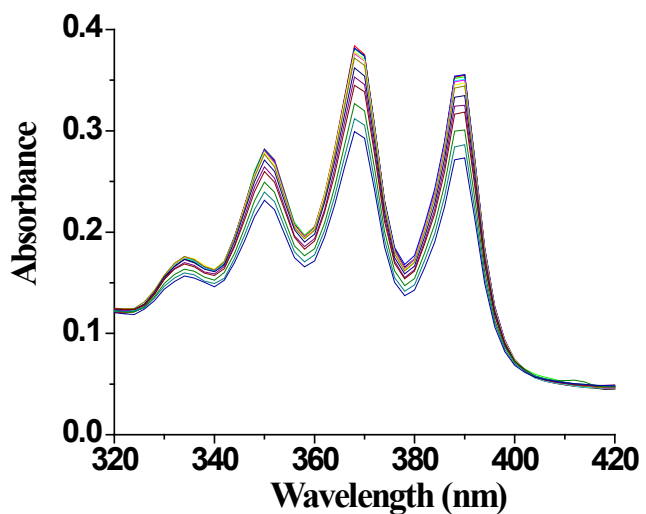

UV-vis titration spectra of **1** with monotetrabutylammonium salt of fumaric acid:

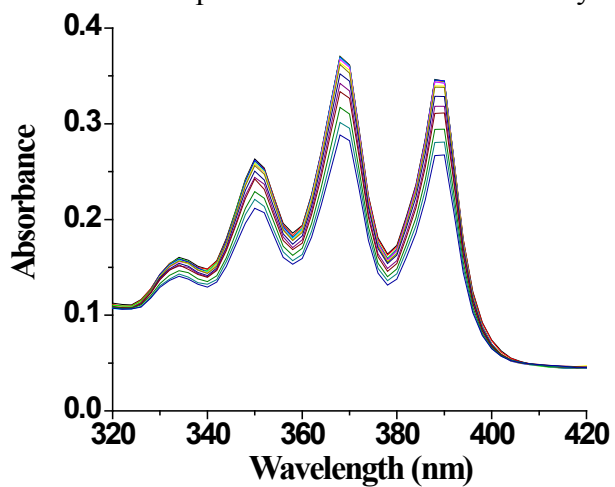

UV-vis titration spectra of **1** with monotetrabutylammonium salt of fumaric acid:

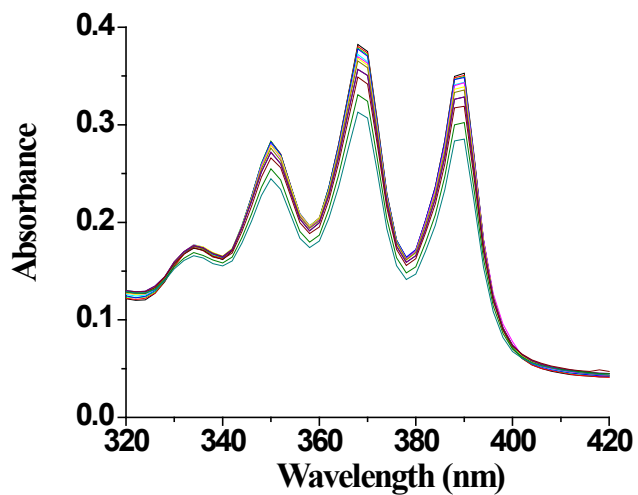

Job plot of receptor **1** with monotetrabutylammonium salts of guest acids:

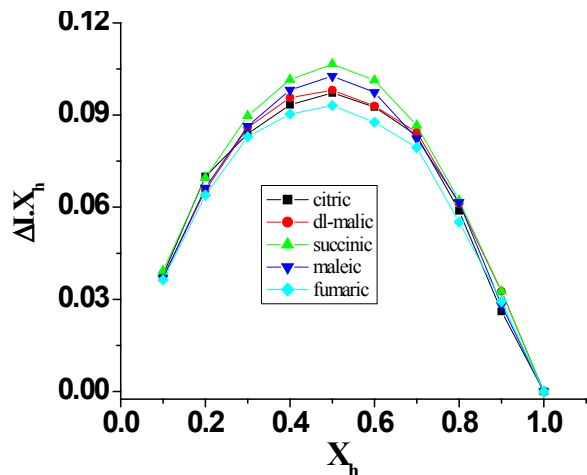

Fluorescence titration spectra of **1** with monotetrabutylammonium salt of citric acid:

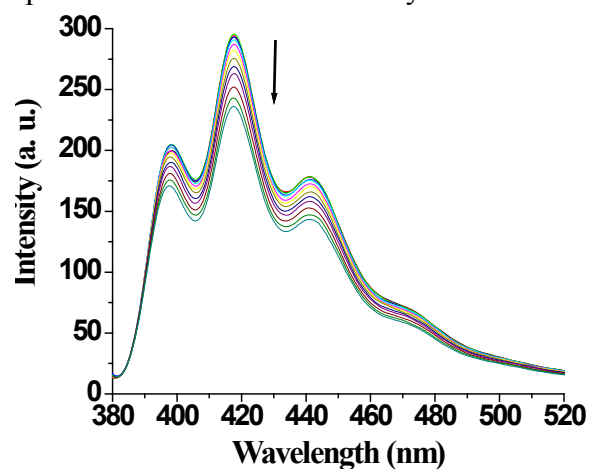

Fluorescence titration spectra of **1** with monotetrabutylammonium salt of dl-malic acid:

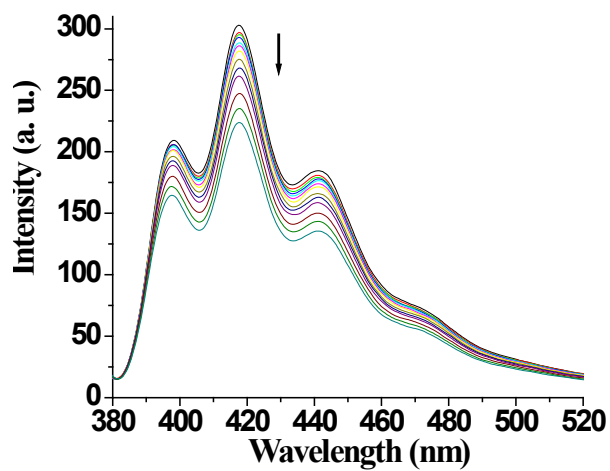

Fluorescence titration spectra of **1** with monotetrabutylammonium salt of succinic acid:

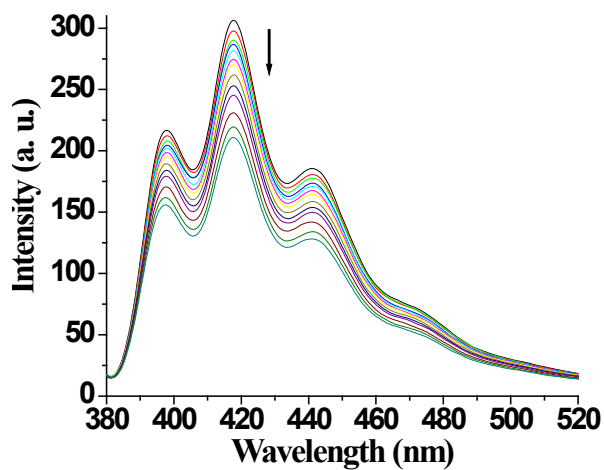

Fluorescence titration spectra of **1** with monotetrabutylammonium salt of maleic acid:

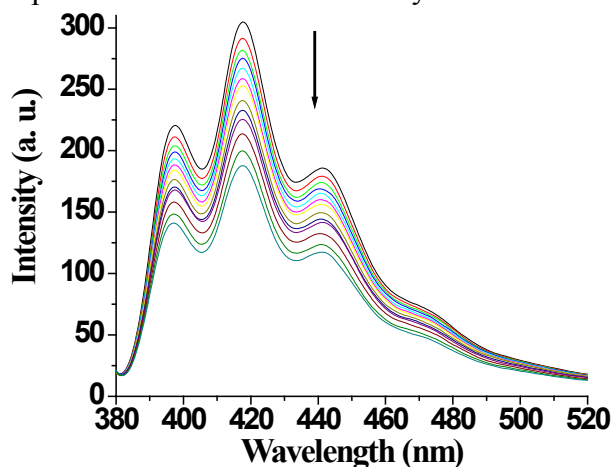

Fluorescence titration spectra of **1** with monotetrabutylammonium salt of fumaric acid:

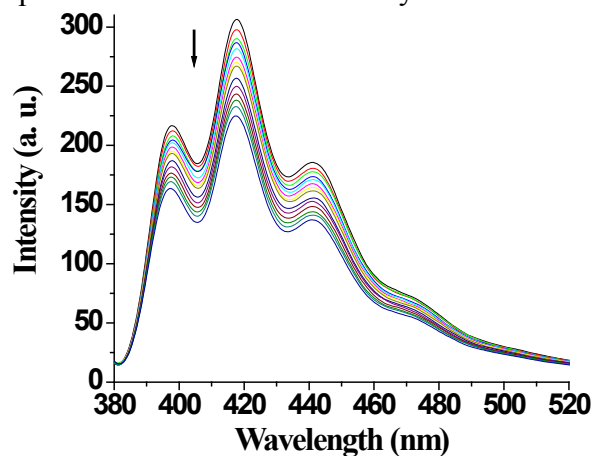

Binding constant calculation curve of the **1** with monotetrabutylammonium salt of guest acids by fluorescence method:

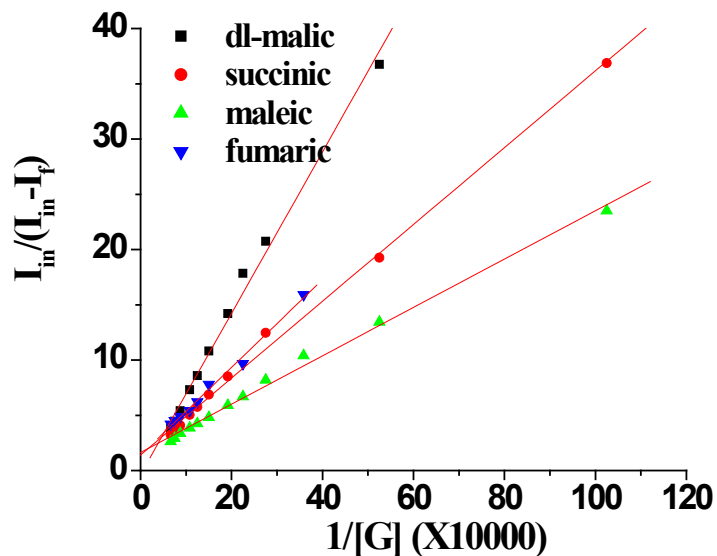



Linear Regression for **1** with mono TBA salt of dl-malic acid:

$$Y = A + B * X$$

| Parameter | Value    | Error   |
|-----------|----------|---------|
| A         | -0.35555 | 0.52334 |
| B         | 0.72958  | 0.02326 |

---

| R       | SD     | N  | P       |
|---------|--------|----|---------|
| 0.99596 | 0.9636 | 10 | <0.0001 |

Linear Regression for **1** with mono TBA salt of succinic acid:

$$Y = A + B * X$$

| Parameter | Value   | Error   |
|-----------|---------|---------|
| A         | 1.56944 | 0.34762 |
| B         | 0.34956 | 0.00928 |

---

| R      | SD      | N  | P       |
|--------|---------|----|---------|
| 0.9965 | 0.84265 | 12 | <0.0001 |

Linear Regression 1 with mono TBA salt of maleic acid:

$$Y = A + B * X$$

| Parameter | Value   | Error   |
|-----------|---------|---------|
| A         | 1.63431 | 0.18366 |
| B         | 0.21875 | 0.0049  |

---

| R      | SD      | N  | P       |
|--------|---------|----|---------|
| 0.9975 | 0.44521 | 12 | <0.0001 |

Linear Regression for **1** with mono TBA of fumaric acid:

$$Y = A + B * X$$

| Parameter | Value   | Error   |
|-----------|---------|---------|
| A         | 2.20135 | 0.27955 |
| B         | 0.34019 | 0.00746 |

---

| R      | SD      | N  | P       |
|--------|---------|----|---------|
| 0.9976 | 0.67766 | 12 | <0.0001 |

Table 6: binding constants of **1** ( $c = 4 \times 10^{-5}$  M) with monotetrabutylammonium salts of the guest acids at 25 °C:

| Entry | Name of the monotetrabutylammonium salt       | Binding constants ( $M^{-1}$ ) |
|-------|-----------------------------------------------|--------------------------------|
| 1     | monotetrabutylammonium salt of citric acids   | -                              |
| 2     | monotetrabutylammonium salt of dl-malic acids | $4.87 \times 10^4$             |
| 3     | monotetrabutylammonium salt of succinic acids | $4.49 \times 10^5$             |
| 4     | monotetrabutylammonium salt of maleic acids   | $7.47 \times 10^5$             |
| 5     | monotetrabutylammonium salt of fumaric acids  | $6.47 \times 10^5$             |

'-' not determined due to irregular change

Change in the absorbance of **2** with succinic acid:

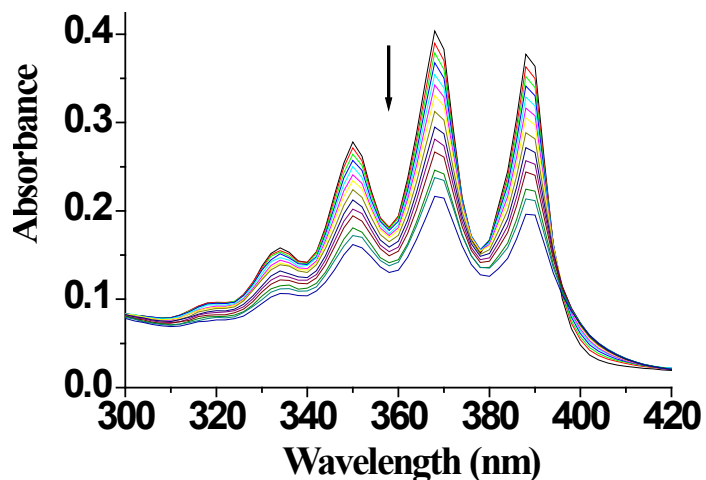

Change in the fluorescence of **2** with succinic acid:

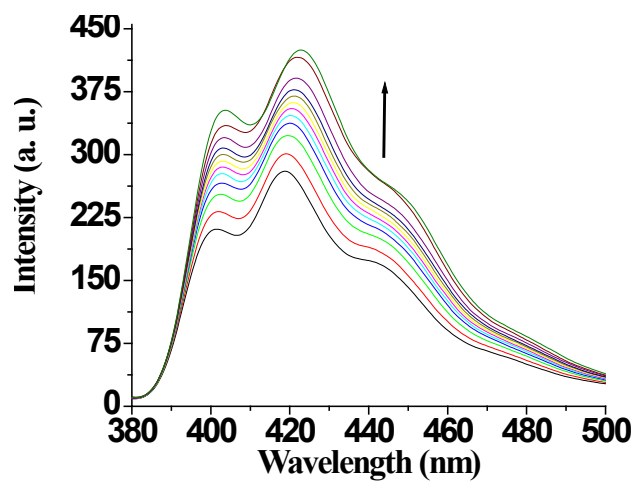

Change in the absorbance of **2** with fumaric acid:

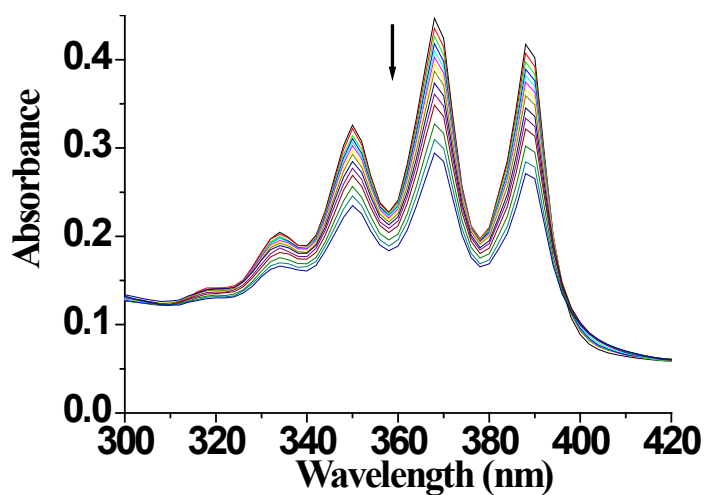

Change in the fluorescence of **2** with fumaric acid:

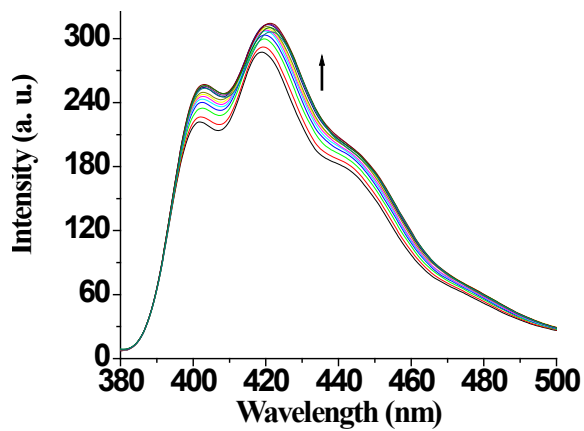

Change in the absorbance of **2** with citric acid:

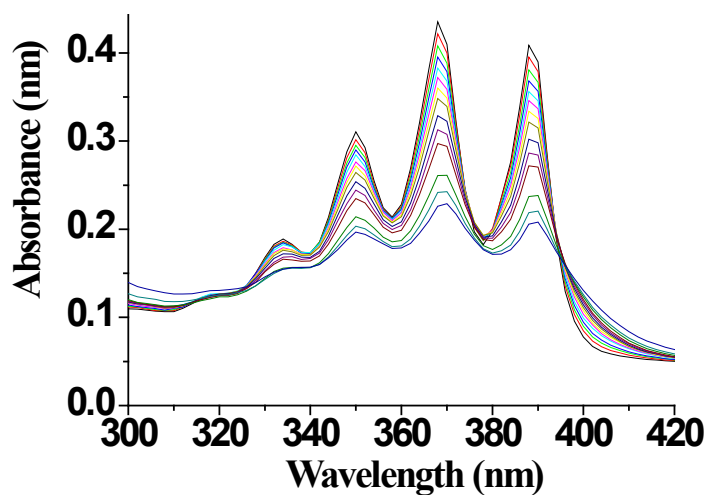

Change in the fluorescence of **2** with citric acid:

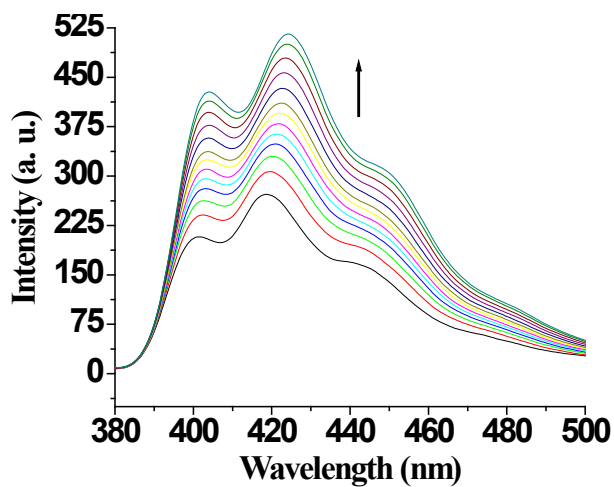

Change of absorbance of **2** with maleic acid:

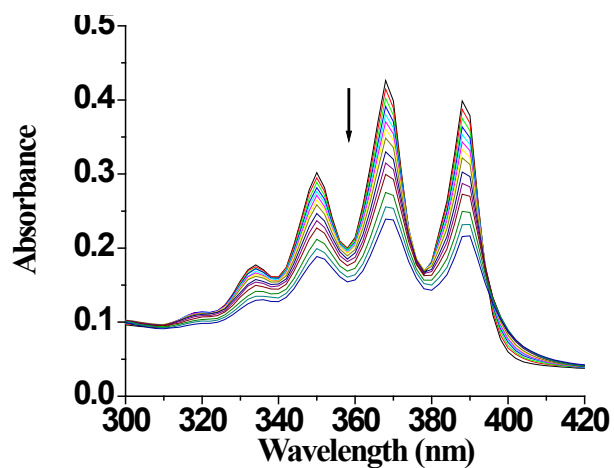

Change of fluorescence of **2** with maleic acid:

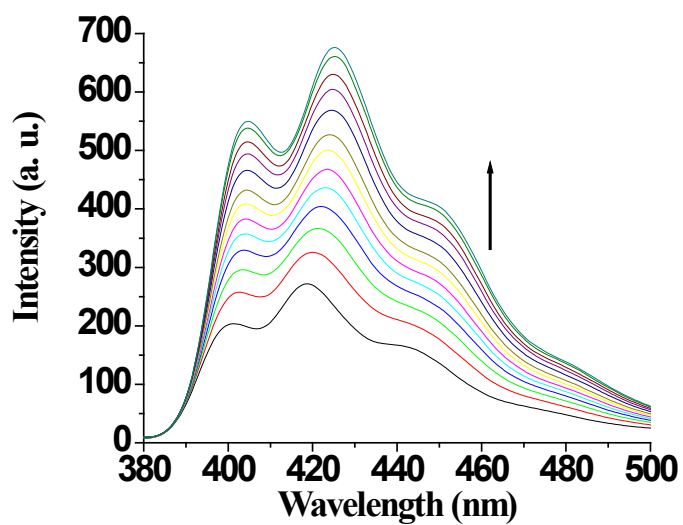

Change in the absorbance of **2** with dl-malic:

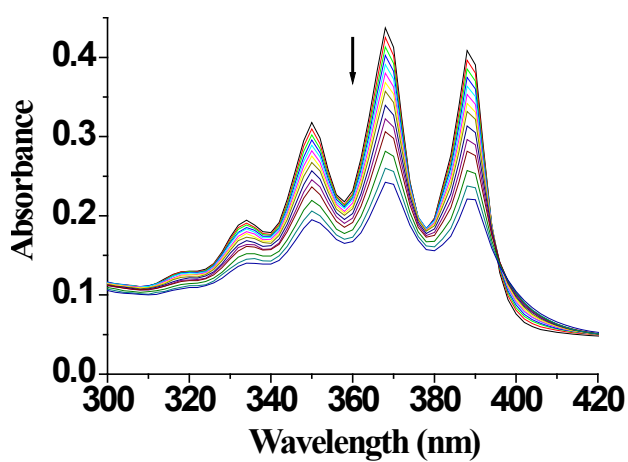

Change in the fluorescence of **2** with dl-malic:

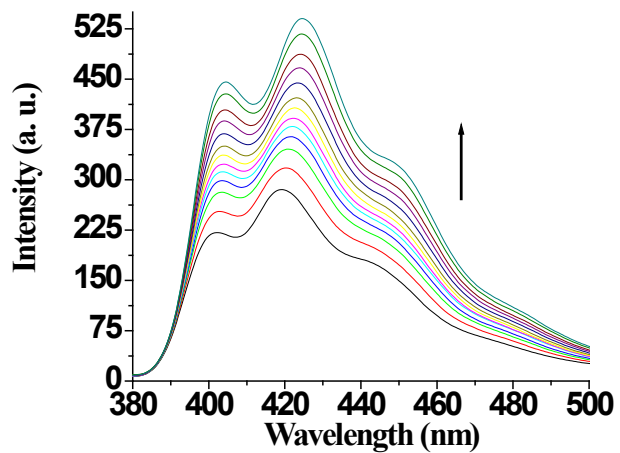

Change in the absorbance of **2** with TFA:

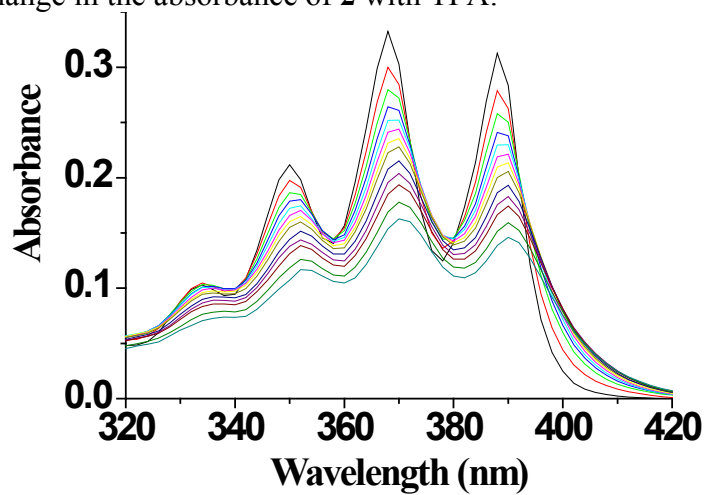

Change in the fluorescence of **2** with TFA:

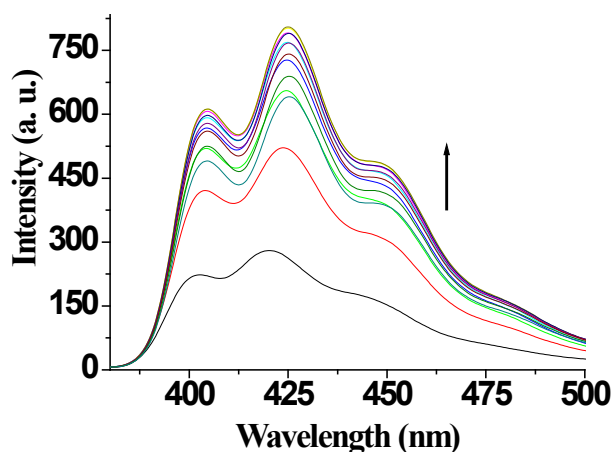

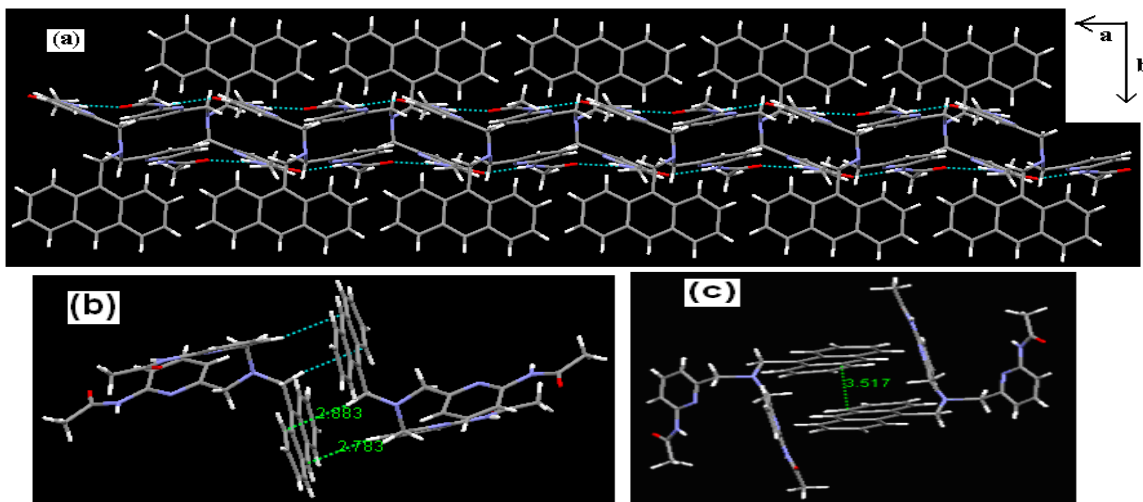

Figure 6: (a) Polymeric zigzag chains of **1** along the crystallography *a* axis, (b) showing two CH/  $\pi$  stacking interactions with anthracene and (c) stacking between the anthracene rings in form **A**.

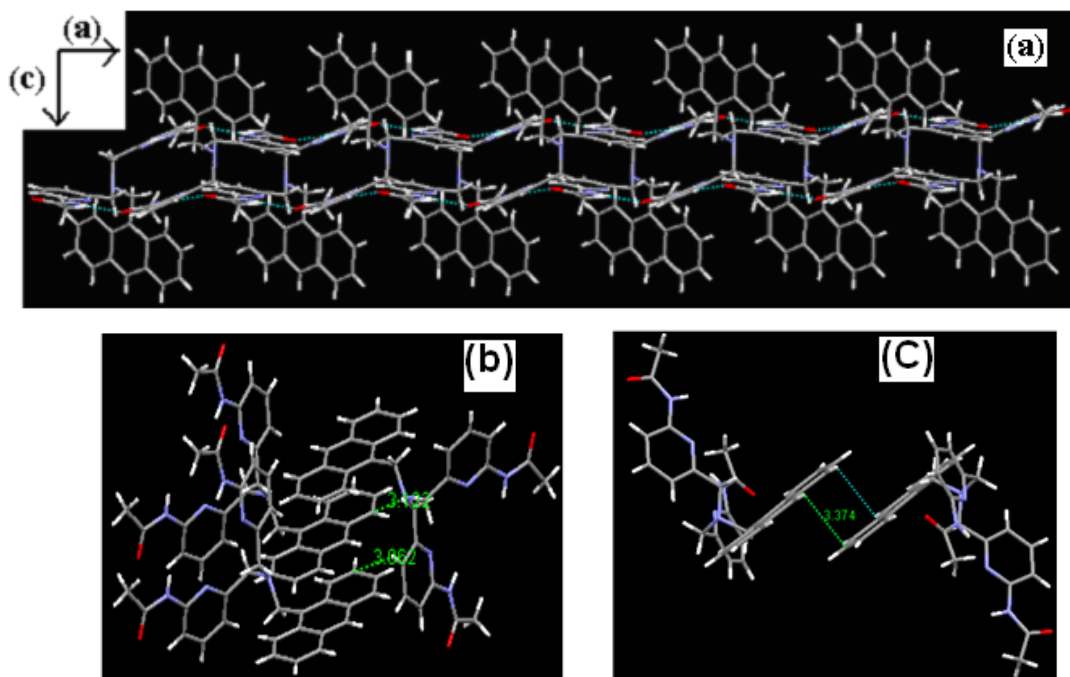

Figure 7: (a) Polymeric zigzag chains of the **1** along the crystallography *a* axis, (b) showing two CH/ $\pi$  interactions with anthracene and (c) stacking between the anthracene rings in form **B**.

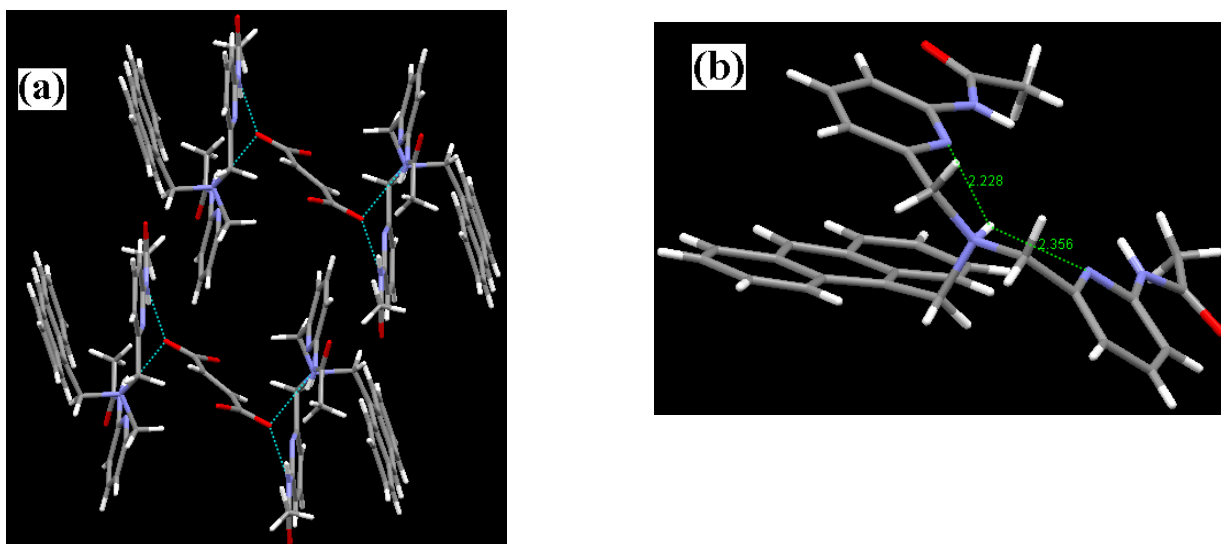

Figure 8: Illustration of crystal structure of co-crystal A (a) viewed down the crystallography *a* axis and (b) distances between the tertiary nitrogen proton and nitrogen of pyridine rings and



**Table 7:** Crystallographic data and structure refinement parameters of **1** in form **A**, form **B** and **co-crystal A**.

| Compound                                                        | Form A                                                            | Form B                                                            | Co-crystal A                                                                                                                                                                                                                                           |
|-----------------------------------------------------------------|-------------------------------------------------------------------|-------------------------------------------------------------------|--------------------------------------------------------------------------------------------------------------------------------------------------------------------------------------------------------------------------------------------------------|
| CCDC No.                                                        | CCDC 780314                                                       | CCDC 780315                                                       | CCDC 789746                                                                                                                                                                                                                                            |
| Empirical Formula                                               | C <sub>31</sub> H <sub>29</sub> N <sub>5</sub> O <sub>2</sub>     | C <sub>31</sub> H <sub>29</sub> N <sub>5</sub> O <sub>2</sub>     | (C <sub>31</sub> H <sub>30</sub> N <sub>5</sub> O <sub>2</sub> ) <sub>2</sub> ,<br>(C <sub>4</sub> H <sub>4</sub> O <sub>4</sub> ) <sub>4</sub> ,<br>(C <sub>4</sub> H <sub>2</sub> O <sub>4</sub> ) <sub>2</sub> ,<br>(H <sub>2</sub> O) <sub>2</sub> |
| Formula weight                                                  | 503.59                                                            | 503.59                                                            | 811.79                                                                                                                                                                                                                                                 |
| Crystal system                                                  | Triclinic                                                         | Triclinic                                                         | Monoclinic                                                                                                                                                                                                                                             |
| Space group                                                     | P-1 (No. 2)                                                       | P-1 (No. 2)                                                       | P21/c (No. 14)                                                                                                                                                                                                                                         |
| T [K]                                                           | 296                                                               | 296                                                               | 100                                                                                                                                                                                                                                                    |
| <i>a</i> [Å]                                                    | 9.4245 (2)                                                        | 9.3680 (2)                                                        | 13.9724 (4)                                                                                                                                                                                                                                            |
| <i>b</i> [Å]                                                    | 9.9653 (2)                                                        | 9.5760 (3)                                                        | 32.9044(9)                                                                                                                                                                                                                                             |
| <i>c</i> [Å]                                                    | 13.9428 (3)                                                       | 16.6792 (5)                                                       | 8.6563 (2)                                                                                                                                                                                                                                             |
| <i>α</i> [deg]                                                  | 84.353 (1)                                                        | 79.700 (2)                                                        | 90                                                                                                                                                                                                                                                     |
| <i>β</i> [deg]                                                  | 88.257 (1)                                                        | 77.133 (2)                                                        | 101.086(2)                                                                                                                                                                                                                                             |
| <i>γ</i> [deg]                                                  | 89.524 (1)                                                        | 66.303 (2)                                                        | 90                                                                                                                                                                                                                                                     |
| Z                                                               | 2                                                                 | 2                                                                 | 4                                                                                                                                                                                                                                                      |
| <i>V</i> [Å <sup>3</sup> ]                                      | 1302.50 (5)                                                       | 1328.99 (6)                                                       | 3905.50(18)                                                                                                                                                                                                                                            |
| <i>D</i> <sub>calc</sub> [g/cm <sup>3</sup> ]                   | 1.284                                                             | 1.258                                                             | 1.381                                                                                                                                                                                                                                                  |
| <i>F</i> [000]                                                  | 532                                                               | 532                                                               | 1704                                                                                                                                                                                                                                                   |
| Crystal size [mm]                                               | 0.10 x 0.37 x 0.59                                                | 0.11 x 0.27 x 0.29                                                | 0.09 x 0.17 x 0.62                                                                                                                                                                                                                                     |
| Theta min-max [deg]                                             | 1.5, 32.5                                                         | 1.3, 26.0                                                         | 1.9, 30.0                                                                                                                                                                                                                                              |
| <i>μ</i> [mm <sup>-1</sup> ]                                    | 0.083                                                             | 0.081                                                             | 0.104                                                                                                                                                                                                                                                  |
| Index ranges                                                    | -14 ≤ <i>h</i> ≤ 14<br>-14 ≤ <i>k</i> ≤ 15<br>-21 ≤ <i>l</i> ≤ 21 | -11 ≤ <i>h</i> ≤ 11<br>-10 ≤ <i>k</i> ≤ 11<br>-19 ≤ <i>l</i> ≤ 20 | -19 ≤ <i>h</i> ≤ 12<br>-45 ≤ <i>k</i> ≤ 45<br>-12 ≤ <i>l</i> ≤ 12                                                                                                                                                                                      |
| Reflections collected                                           | 38829                                                             | 20782                                                             | 49877                                                                                                                                                                                                                                                  |
| Unique reflections                                              | 9347                                                              | 5206                                                              | 11309                                                                                                                                                                                                                                                  |
| Observed reflections<br>[ <i>I</i> > 2.0 <i>σ</i> ( <i>I</i> )] | 5742                                                              | 3539                                                              | 6798                                                                                                                                                                                                                                                   |
| <i>R</i> <sub>1</sub> [ <i>I</i> > 2 <i>σ</i> ( <i>I</i> )]     | 0.0551                                                            | 0.0538                                                            | 0.0878                                                                                                                                                                                                                                                 |
| w <i>R</i> <sub>2</sub>                                         | 0.1579                                                            | 0.1453                                                            | 0.2596                                                                                                                                                                                                                                                 |
| GOF                                                             | 1.06                                                              | 1.05                                                              | 1.05                                                                                                                                                                                                                                                   |

**Table 8:** Hydrogen-bond parameters (Å, °) of **1** in form **A**.

| D-H...A                      | D-H        | H...A      | D...A       | D-H...A    |
|------------------------------|------------|------------|-------------|------------|
| N1-H1N1....O2 <sup>i</sup>   | 0.854 (16) | 2.090 (16) | 2.9300 (15) | 167.8 (14) |
| N5-H1N5....O1 <sup>ii</sup>  | 0.847 (16) | 2.155 (16) | 2.9802 (15) | 164.6 (14) |
| Intra C12-H12A....N3         | 0.93       | 2.62       | 3.1551 (18) | 117        |
| Intra C20-H20A....O1         | 0.93       | 2.32       | 2.8787 (18) | 119        |
| C23-H23B....O2 <sup>i</sup>  | 0.96       | 2.44       | 3.3092 (19) | 150        |
| Intra C24-H24B....N2         | 0.97       | 2.48       | 3.1644 (16) | 128        |
| Intra C26-H26A....N3         | 0.93       | 2.55       | 2.8650 (17) | 100        |
| Intra C28-H28A....O2         | 0.93       | 2.25       | 2.8315 (18) | 120        |
| C31-H31D....O1 <sup>ii</sup> | 0.96       | 2.59       | 3.2254 (18) | 124        |

Symmetry codes: (i) 2-x, 2-y,-z, (ii) 1-x, 2-y,-z

**Table 9:** Hydrogen-bond parameters (Å, °) of **1** in form **B**.

| D-H...A                      | D-H      | H...A    | D...A     | D-H...A    |
|------------------------------|----------|----------|-----------|------------|
| N1-H1N1....O2 <sup>i</sup>   | 0.86 (3) | 2.06 (3) | 2.899 (3) | 164 (2)    |
| N5-H1N5....O1 <sup>ii</sup>  | 0.88 (2) | 2.10 (3) | 2.974 (3) | 170.1 (19) |
| Intra C20-H20A....O1         | 0.93     | 2.28     | 2.860 (3) | 120        |
| C23-H23A....N4 <sup>ii</sup> | 0.96     | 2.53     | 3.453 (4) | 161        |
| Intra C24-H24A....N2         | 0.97     | 2.48     | 3.188 (3) | 130        |
| Intra C28-H28A....O2         | 0.93     | 2.29     | 2.865 (3) | 120        |
| C31-H31B....O1 <sup>ii</sup> | 0.96     | 2.52     | 3.375 (4) | 148        |

Symmetry codes: (i) 1-x,1-y,1-z, (ii) 2-x,1-y,1-z

Table 10: pKa values of different diacids.

| Serial No. | Name of acid | First pKa | Second pKa | Third pKa |
|------------|--------------|-----------|------------|-----------|
| 1          | Succinic     | 4.2       | 5.6        | -         |
| 2          | dl-Malic     | 3.4       | 5.1        | -         |
| 3          | Fumaric      | 3.5       | 4.5        | -         |
| 4          | Maleic       | 1.8       | 6.5        | -         |
| 5          | Citric       | 3.1       | 4.7        | 5.4       |

## Experimental

### General

Melting points (mp) were recorded on an A. D. and Co. hot-coil stage melting point apparatus and are uncorrected. NMR spectra were recorded in dry  $\text{CDCl}_3$  unless otherwise mentioned with TMS as the internal standard with Bruker AM 500 MHz NMR and Bruker AVANCE DPX 300 MHz instruments (mentioned case wise). Chemical shifts are given in  $\delta$  (ppm) scale and  $J$  values in Hz. IR spectra were measured in KBr disk with a JASCO FT/IR-460 plus spectrometer. UV-vis spectra were recorded on a JASCO V-530. Fluorescence spectra were recorded on Perkin Elmer LS-55. HRMS of **1** and compound **3** were recorded on a Qtof Micro YA263 instrument. Mass spectra of other compounds are done by Micromass Quattro II (LC-ESI-MS). All solvents were dried prior to use by common methods. Silica gel 100–200 mesh was used for all chromatographic purifications. Starting materials are commercially available (purchased from Fluka and Aldrich).

### General procedure for UV-vis. and Fluorescence titration

Stock solution of sensor **1** and **2** was prepared at a concentration of  $4 \times 10^{-5} \text{ mol/dm}^3$  in dry  $\text{CHCl}_3$ . Acids were dissolved in 2% DMSO in  $\text{CHCl}_3$  in  $4 \times 10^{-4} \text{ mol/dm}^3$  concentration. DMSO (2%) was added to make a homogeneous solution. Solutions of receptors (2 mL) were taken in the cell and guest solutions were then added to solutions and continuous changes in absorbance and fluorescence intensity were recorded each time. The chloroform solution of guest anions were taken for titration as their tetrabutylammonium salts which are easily soluble in  $\text{CHCl}_3$ . Association constants were calculated by plotting  $I_0/I_0 - I$  vs  $1/[G]$  ( $I_0$  and  $I$  are the initial and final intensity of the solution after each addition during titration).

### Procedure for Job plot:

Solutions of **1** and **2** were prepared in a concentration  $4 \times 10^{-5} \text{ mol/dm}^3$ . Guest solutions were also made in the concentration  $4 \times 10^{-5} \text{ mol/dm}^3$ . The solutions of host and the guest were added in 1.8:0.2, 1.6:0.4, 1.4:0.6, 1.2:0.8, 1:1, 0.8:1.2, 0.6:1.4, 0.4:1.6, 0.2:1.8 ratio and the absorbances were recorded. Plot of  $X_h$  Vs  $\Delta I \cdot X_h$  give curves with breaking at 0.5 with mole fraction of host replies a 1:1 stoichiometry.

### **General Procedure for the synthesis of monotetrabutylammonium salt of the guest acids:**

Mononeutralization reactions of the corresponding diacids by tetrabutylammonium hydroxide were carried out for the preparation of the monotetrabutylammonium ammonium salts of the guest acids according to literature procedure (M. Giffard, G. Mabon, N. Mercies, P. Molinié, T.P. Nguyen, A. Riou and M. Vautrin, *Synthetic Metals*, 1999, **102**, 1766). Elemental analysis was performed for their characterization.

### **X-ray crystallography**

Intensity data of all the compounds were collected with the Bruker SMART APEXII CCD area-detector diffractometer (Mo K $\alpha$  radiation,  $\lambda = 0.7107\text{\AA}$ ) using the APEX2 software [18]. The low temperature data for complex **A** were collected using the Oxford Cryosystem Cobra low-temperature attachment (Both data were collected at room temperature). Data reductions were performed using SAINT [18]. Absorption corrections were performed using SADABS [17]. The structures were solved by direct methods. The non-hydrogen atoms were refined anisotropically. The Ortep23 figures were plotted using SHELXTL [17].
